1 **Autonomous development and regeneration of isolated rice egg cells in a fertilization-**  
2 **independent manner**

3

4 Kasidit Rattanawong<sup>1\*</sup>, Kaori Totsuka<sup>1</sup>, Shizuka Koshimizu<sup>2-5</sup>, Kentaro Yano<sup>2</sup>, Takashi  
5 Okamoto<sup>1\*</sup>

6

7 <sup>1</sup>Department of Biological Sciences, Tokyo Metropolitan University, Minami-osawa,  
8 Hachioji, Tokyo, Japan.

9 <sup>2</sup>Department of Life Sciences, Meiji University, Kanagawa, Japan.

10 <sup>3</sup>Department of Informatics, National Institute of Genetics, Shizuoka, 411-8540, Japan

11 <sup>4</sup>Bioinformation and DDBJ Center, National Institute of Genetics, Shizuoka, 411-8540 Japan

12 <sup>5</sup>Department of Genetics, SOKENDAI University, Yata 1111, Mishima 411-8540, Shizuoka,  
13 Japan

14

15

16 \*Corresponding authors:

17 Kasidit Rattanawong

18 E-mail: kasidit.rtw@gmail.com

19 Takashi Okamoto

20 E-mail: okamoto-takashi@tmu.ac.jp

21

22

23 **Abstract**

24

25 Parthenogenesis is suppressed in rice egg cells to avoid precocious development before  
26 fertilization. We found that cold treatment released cell cycle arrest in egg cells and triggered  
27 mitosis. Egg cells isolated from *japonica* (Nipponbare; NB) and *aus* (Kasalath; KS)  
28 subspecies divided and regenerated into mature plants after cold treatment. The egg-derived  
29 plants showed variety of ploidy levels, including haploid (n), diploid (2n), and tetraploid (4n).  
30 Nuclear DNA quantification showed that genome duplication occurred during early  
31 parthenogenetic development. Owing to the presence of single nucleotide polymorphisms  
32 (SNPs) between NB and KS, inter-subspecific hybrid plants (NB-KS hybrids) were created  
33 via electrofusion. Egg cells from the NB-KS hybrid developed parthenogenetically into  
34 polyploid plants. 2n and 4n plants originating from the same NB-KS egg cell displayed the  
35 same homozygous SNP patterns throughout the genome, indicating that these plants were  
36 doubled and quadrupled haploids. Transcriptome analyses of cold-treated egg cells  
37 demonstrated that parthenogenesis-related candidate genes, including *OsBBML1*, were  
38 upregulated.

39

40 **Introduction**

41

42 Living organisms generally expand the range of their species via sexual reproduction, which  
43 requires the contribution of both male and female gametes. The resulting higher levels of  
44 genetic diversity lead to an increase in fitness and long-term survival of a species through the  
45 combination of allele sets from both parents known as “biparental inheritance.” The  
46 production of genetically identical clones through asexual reproduction is crucial for a variety  
47 of species that require rapid and substantial increases in the number of offspring. Because  
48 only a single parent is required for asexual reproduction, the created progeny will possess full  
49 sets of genes derived from one parent known as “uniparental inheritance.” Asexual  
50 reproduction can proceed via somatic or gametic cells. A well-studied female gamete-  
51 mediated embryogenesis that widely occurs in plant and animal species is parthenogenesis,  
52 spontaneous development of an embryo from an unfertilized egg cell (reviewed in Vijverberg,  
53 Ozias-Akins, and Schranz 2019). Although the emergence of progenies from unfertilized  
54 oocytes or egg cells is a common phenomenon in animals and plants, the production mode of  
55 parthenogenetic progenies differs between animals and flowering plants. In animals,  
56 autonomous development of the parthenogenetic embryo occurs after meiosis with or without  
57 restoration of diploid chromosome number via fusion of haploid nuclei or chromosome  
58 doubling during the endomitotic cycle (Avisé, 2008). The nutrient supply during embryonic  
59 development is directly provided by the mother, resulting in the formation of mature embryos  
60 as parthenogenetic progeny. In flowering plants, progenies are formed as seeds consisting of  
61 embryos and endosperms, which are derived from fertilized egg cells and central cells; hence,  
62 parthenogenetic development of unfertilized egg cells can be detected as a part of  
63 fertilization-independent asexual seed formation known as apomixis. In diplospory, an  
64 apomictic type of unreduced female gametes are produced via apomeiosis, and unreduced  
65 egg cells parthenogenetically develop into embryos with autonomous or pseudogamous

66 development of unreduced central cells into the endosperm (Pupilli and Barcaccia, 2012;  
67 Conner et al., 2017; Hand and Koltunow, 2014).

68         Investigations of parthenogenesis in angiosperms have been conducted mainly using  
69 three approaches: 1) cytological analyses, 2) genetic approaches, and 3) autonomous  
70 development of egg cells. Cytological studies have indicated that in angiosperms, mature egg  
71 cells normally possess largely condensed repressive chromatin and a relatively silent  
72 transcriptional state, a mechanism that prohibits egg cells from precocious development  
73 without proper fertilization with a sperm cell (Garcia-Aguilar et al., 2010; Pillot et al., 2010).  
74 These repression mechanisms need to be released to enable developmentally arrested egg  
75 cells to proceed with parthenogenesis or even undergo normal zygotic development to obtain  
76 totipotency after fertilization (Baroux and Grossniklaus, 2015). It is assumed that  
77 parthenogenesis is triggered by genetic reprogramming via spontaneous de-repression of  
78 chromatin and subsequent activation of transcription machinery in unfertilized egg cells. In  
79 addition, cell cycle arrest is abrogated or highly reduced in parthenogenetic egg cells.

80         Genetic approaches to study parthenogenesis have been based on the determination of  
81 parthenogenesis-related gene loci and subsequent identification of genes responsible for  
82 parthenogenesis in the loci. Genes encoding transcription factors *Apospory-specific Genome*  
83 *Region BabyBoom*-like (*ASGR-BBML*) 1 and *PARTHENOGENESIS (PAR)* were identified in  
84 parthenogenetic pearl millet (*Pennisetum squamulatum*) and dandelion, respectively, and  
85 have been reported to induce parthenogenesis in egg cells of sexual pearl millet and  
86 dandelion upon ectopic expression under *Arabidopsis* egg cell-specific promoters (Conner et  
87 al., 2015; Underwood et al., 2022). In addition, *PsASGR-BBML1* and *OsASGR-BBML1*  
88 (*OsBBML1*), rice orthologs of *PsASGR-BBML1*, induce parthenogenesis in rice and maize  
89 through their ectopic expression in egg cells (Conner et al., 2017; Khanday et al., 2019;  
90 Rahman et al., 2019). Heterologous expression of *PAR* gene from the dandelion, driven by

91 *ECI* promoter, induced the formation of parthenogenetic haploid embryos in lettuce egg cells  
92 without fertilization (Underwood et al., 2022).

93         The developmental profile of parthenogenetic egg cells was monitored with the  
94 Salmon System established in wheat, as the “Salmon” line, in which the short arm of  
95 chromosome 1B of wheat is replaced by the short arm of chromosome 1R of rye, produces  
96 haploid embryos via parthenogenesis where the cytoplasm of *Aegilops kotschy* or *Ae.*  
97 *caudata* is introduced (Tsunewaki and Mukai, 1990). It has been demonstrated that  
98 parthenogenetic development of egg cells is independent of the signals derived from ovular  
99 tissues/ovaries, as embryos could develop directly from egg cells isolated from  
100 parthenogenetic lines of Salmon wheat, (*caudata*)-Salmon, and (*kotschy*)-Salmon, in an in  
101 vitro culture system (Tsunewaki and Mukai, 1990; Kumlehn et al., 2001). Transcriptional  
102 analysis using a cDNA library synthesized from mRNA isolated from parthenogenetic egg  
103 cells of *caudata*-Salmon wheat showed that the highly represented ETS group was a  
104 homologue of the barley *ECA1* gene, which is specifically expressed in the early stage of  
105 microspore embryogenesis, suggesting its potential role in the parthenogenesis of Salmon  
106 wheat (Kumlehn et al., 2001; Pulido et al., 2009).

107         Within embryo sacs, plant egg cells are widely known to reside in quiescence at the  
108 G1 phase of the cell cycle but appear to be ready for development upon fertilization in both  
109 monocots and dicots (Mogensen and Holm, 1995; Sukawa and Okamoto, 2018; Liu et al.,  
110 2020). Notably, single-cell type transcriptome analyses using egg cells of *Arabidopsis* (Wuest  
111 et al., 2010), rice (Anderson et al., 2013), and maize (Chen et al., 2017) suggested that RNA,  
112 proteins, and other molecules are stored in egg cells to support embryogenesis upon egg  
113 activation. Therefore, a single factor might be sufficient to release cell cycle arrest and  
114 activate embryogenic development, thereby initiating the parthenogenetic (autonomous)  
115 development of egg cells (Vijverberg et al., 2019). Initiation of parthenogenesis induced by

116 the ectopic expression of *ASGR-BBML1* and *PARI* in egg cells is an artificial parthenogenetic  
117 trigger (Khanday et al., 2019; Rahman et al., 2019; Underwood et al., 2022).

118 As possible triggers for breaking the repressive state of egg cells, environmental  
119 stresses and stimuli have been reported as parthenogenesis-initiating factors. For example,  
120 ovaries isolated from sexual plants such as durum wheat (Sibi et al., 2001) and sugar beets  
121 (Gürel et al., 2000) were pretreated with cold stress and then cultured to obtain haploid plants.  
122 Although direct evidence is still lacking, it has been suggested that this phenomenon, termed  
123 gynogenesis, is due to the parthenogenetic development of egg cells embedded in cold-  
124 stressed ovaries. Parthenogenesis in angiosperms has been intensively investigated, as  
125 asexual events are closely related to the nature of plant reproduction and are highly important  
126 for agricultural use in the production of doubled-haploid plants for instant genotype fixation  
127 (heterosis fixation) (Sailer et al., 2016). However, knowledge of the mechanisms of  
128 parthenogenesis in angiosperms remains limited. This is partly because the egg cells of  
129 angiosperms are deeply embedded in the ovaries, making direct analysis of the egg cell  
130 difficult. Moreover, an experimental system that can artificially induce autonomous division  
131 and development of egg cells has not yet been established.

132 In this study, we successfully demonstrated the autonomous division and development of  
133 isolated rice egg cells from unpollinated ovaries in a fertilization-independent manner.  
134 Despite residing in quiescence, the exposure of egg cells isolated from wild-type *japonica*  
135 rice (*Oryza sativa* cv. Nipponbare, NB) to cold stress can effectively induce spontaneous  
136 division. In addition, we found that egg cells isolated from *aus* rice (*O. sativa* cv. Kasalath,  
137 KS) showed parthenogenetic development without cold-pretreatment. The divided egg cells  
138 were able to regenerate into sexually mature plants with a variety of ploidy levels, including  
139 haploid (n), diploid (2n), and tetraploid (4n), with variable morphological characteristics and  
140 fertility. Nuclear DNA quantification was performed to demonstrate that genome duplication

141 from  $n$  to  $2n$  occurs during the early egg cell proliferation stage. Inter-subspecific hybrid  
142 plants between NB and KS (NB-KS hybrid) were created via electrofusion of NB egg and KS  
143 sperm cells. The egg cells isolated from the NB-KS hybrid plants were cultured into plantlets,  
144 resulting in the production of haploid, diploid, and tetraploid rice plants. Genome sequencing  
145 and subsequent single nucleotide polymorphism (SNP)-based analyses of these rice plants  
146 confirmed that diploid and tetraploid plants from isolated rice egg cells are doubled and  
147 quadrupled haploids, respectively. Finally, transcriptome analyses of isolated egg cells  
148 treated with cold temperature revealed upregulation of parthenogenesis-inducing genes and  
149 downregulation of dormancy-related genes, indicating the possible conversion of cold-treated  
150 egg cells from quiescent to parthenogenetic states.

151

152 **Results**

153

154 **Parthenogenetic development of egg cells isolated from unpollinated flowers of *japonica***  
155 **(cv NB) and *aus* (cv KS) rice plants**

156 To examine the parthenogenetic competence of sexual non-parthenogenetic *japonica* rice (cv  
157 NB), egg cells, which reproduce through sexual pathways and require fertilization with sperm  
158 cells for activation toward embryogenesis, were isolated from unpollinated flowers and  
159 cultured to examine the possible fertilization-independent division and development of egg  
160 cells. When isolated NB egg cells were transferred into the culture medium without any  
161 pretreatment, all 30 cultured egg cells became undeveloped and degenerated within three  
162 days after culture (DAC) (Fig. 1 and Table 1). However, when egg cells were pre-incubated  
163 at 4 °C for 12 h prior to cultivation, 25 of 216 cultured cells (11.5%) divided into 2-celled  
164 structures at 2 DAC and developed further into multicellular structures within 5 DAC (Figs. 1,  
165 2, and Table 1). These results suggest that preceding cold treatment can trigger the  
166 parthenogenetic development of isolated rice egg cells without the contribution of male  
167 factors and independent of the signals derived from ovary/ovular tissues. Notably, 19 cell  
168 masses were developed from the 25 autonomously divided egg cells; and among these, 16  
169 further developed into white cell colonies (Fig. 2 and Table 1), which were then transferred to  
170 regeneration medium to stimulate shoot and root formation. Eight regenerated plantlets were  
171 obtained (Fig. 2 and Table 1), which were then transferred to soil pods and cultivated in an  
172 environmental chamber, allowing them to grow into mature rice plants with developed  
173 flowers (Supplementary Fig. 2).

174 In addition to *japonica* NB rice, we tested the parthenogenetic competence of egg  
175 cells isolated from unpollinated flowers of *aus* rice (cv. KS) using the same experimental  
176 procedure. Interestingly, 18 of 53 KS egg cells (34%) exhibited cell division without cold



177 treatment (Table 1), and in the case of KS egg cells with cold treatment, the division rate  
178 increased to 42.8% (Table 1). This suggests that regardless of cold exposure, egg cells  
179 isolated from unpollinated flowers of KS rice plants showed high efficiency of fertilization-  
180 independent development and that KS egg cells might be more parthenogenetically active  
181 than NB egg cells under the in vitro culture system. Moreover, it was also suggested that the  
182 procedure of egg cell isolation from unpollinated ovaries and subsequent culture of isolated  
183 cells can trigger parthenogenetic development of KS egg cells, and that pretreatment with  
184 cold stress further enhances their parthenogenetic potential. To overcome the difficulty in  
185 visualizing the number of nuclei/cells during autonomous egg cell division, KS plants  
186 expressing GFP-tagged histones (H2B-GFP) were produced to enable direct observation of  
187 the number of nuclei during the parthenogenetic development of egg cells (Abiko et al.,  
188 2013). We found that without cold treatment egg cells started to divide at 2 DAC, as two  
189 nuclei were detected in the divided egg cells and multiple nuclei of the multicellular  
190 structures were observed at 3–4 DAC (Supplementary Fig. 1A). A single nucleus was  
191 continuously visualized in the undivided egg cells, and the cells disintegrated at about 4 DAC  
192 (Supplementary Fig. 1A). These results suggest that the first cell division of  
193 parthenogenetically activated egg cells appeared at 1 DAC. For the number of plants formed  
194 from divided egg cells, without cold treatment, 13 cell masses developed into seven white-  
195 cell colonies, which later formed seven plant lines (Table 1). Because a plant line has the  
196 potential to regenerate into multiple shoots under the callus-mediated regeneration system  
197 used in this study (Uchiumi et al., 2007; Toki et al., 2006), each KS egg-derived plant line  
198 regenerated into two plantlets, resulting in the formation of 14 plantlets (Table 1). For the  
199 cold-treated KS egg cells, 4 of 11 cell masses developed into white cell colonies, and four  
200 plant lines were obtained, which were regenerated into six plantlets (Table 1).

201

202 **Characterization of egg cell-derived rice plants: Ploidy, morphological characteristics,**  
203 **fertility, and gamete isolation efficiency**

204 The ploidy levels of the rice plants regenerated from egg cells were measured to examine  
205 whether the original ploidy level of egg cells was retained. First, nuclei were extracted from  
206 the leaves of diploid wild-type NB plants; the DNA content per nucleus was measured via  
207 flow cytometry, which normally exhibited one single peak of 2C, and used as a diploid  
208 control for ploidy level assessment (Fig. 3A). Of the 28 egg-derived plants (Table 1), four  
209 plants with small flowers and short statures (Fig. 3H, I, J, Table 2, and Supplementary Fig. 2)  
210 showed a peak at 1C (Fig. 3B), whereas 10 and 12 plants exhibited 2C and 4C peaks,  
211 respectively (Fig. 3C, D and Table 2). Peaks beyond 4C were also detected in the two egg-  
212 derived plants, which were estimated to be aneuploid (Fig. 3F and Table 2). These results  
213 suggest that the plants regenerated from egg cells preferably undergo genomic duplication to  
214 increase the ploidy numbers, as three-fourths of the plants obtained from egg development  
215 were shown to possess ploidy levels higher than haploids. In addition, the ratio of 2n:4n was  
216 almost equal to 1:1 (Table 2), indicating that repeated genome duplication occurred during  
217 the culture of isolated egg cells and/or regeneration of egg cell-derived cell masses.

218

219 **Genome duplication during early proliferation of NB-derived egg cells treated with or**  
220 **without cold treatment**

221 The presence of haploid individuals confirms that the egg-derived plants were directly  
222 developed from the haploid egg cells with cold treatment of NB egg cells and with or without  
223 cold treatment of KS egg cells (Fig. 2 and Table 2). Notably, the majority of egg-derived  
224 plants were diploid and tetraploid (Table 2), suggesting that genome doubling might occur  
225 during the parthenogenetic development of egg cells into plantlets. Therefore, to judge  
226 whether the possible genome duplication occurred during the early proliferation stage of the

227 egg cell, the relative amount of nuclear DNA in egg cells and the cells of 2-celled, 4- to 8-  
228 celled, and 10- to 20-celled stages of egg-derived multicellular structures was monitored (Fig.  
229 4). The frequency histogram of the relative amount of nuclear DNA of the haploid egg cells  
230 showed fluorescence intensity grouped around 3 arbitrary units (AU), which corresponds to  
231 the haploid amounts of nuclear DNA (Fig. 4A). In the 2-celled stage, the frequency histogram  
232 indicated the emergence of cells that exhibited an approximately 2-fold increase in relative  
233 fluorescence intensity compared to the egg cells (Fig. 4B). The presence of a larger number  
234 of cells with increased relative fluorescence intensity was observed in 4- to 8-celled  
235 multicellular structures (Fig. 4C), and the increased relative fluorescence intensity was  
236 detected in the nuclei of most cells of 10- to 20-celled multicellular structures (Fig. 4D). The  
237 gradual increase in the percentage of cells possessing approximately double the amount of  
238 nuclear DNA compared to egg cells suggested that duplication of the nuclear genome  
239 occurred during fertilization-independent development of egg cells into multicellular  
240 structures (Fig. 4A–D). Taken together, during the early stage of parthenogenetic  
241 development, the genome of haploid egg cells doubled, and the ploidy level of developing  
242 egg cells increased 2-fold, thereby changing from a haploid to diploid state.

243

#### 244 **Production of NB-KS hybrid rice plants, culture of egg cells isolated from NB-KS** 245 **hybrid, and ploidy of rice plants regenerated from the NB-KS hybrid egg cells**

246 By culturing NB egg cells with cold treatment and KS egg cells, haploid, diploid, and  
247 tetraploid rice plants were obtained, and possible genome polyploidization was considered to  
248 occur during egg cell proliferation (Fig. 4). Further, to confirm that these polyploids are true  
249 doubled-haploid and quadrupled-haploid at the genomic DNA level, we prepared hybrid rice  
250 plants between NB and KS. Egg cells (NBKS egg cells) isolated from the unpollinated  
251 flowers of the NBKS hybrid rice plants were cultured into plants, and the genome DNA

252 sequences from these regenerated plants were analyzed using SNPs between NB and KS. An  
253 NB egg cell was fused with a KS sperm cell, and the resultant NB-KS hybrid zygote was  
254 cultured into plantlets, termed the NBKS hybrid. Three NBKS hybrid lines derived from  
255 three independent NBKS zygotes, termed NBKS hybrids I, II, and III, were used for the  
256 developmental profile investigation. When egg cells isolated from the NBKS hybrid, termed  
257 NBKS egg cells, were cultured with or without cold pretreatment, they parthenogenetically  
258 developed and regenerated into plantlets (Fig. 5), with a division efficiency of 14–26%  
259 depending on the treatment conditions (Table 3). The ploidy of all regenerated plants (126  
260 plants, Table 4) was measured, and 10 haploid, 51 diploid, and 54 tetraploid plants were  
261 detected (Table 5). To examine the doubling of haploid embryos at the genome sequence  
262 level, several regenerated plants were subjected to genome sequence analysis.

### 263 **Genome composition of NBKS egg cell-derived rice plant**

264 Among the NBKS egg-derived plants, one haploid plant from NBKS hybrid I egg cell, and  
265 one diploid plant and one tetraploid plant from the same NBKS hybrid II egg cell, were  
266 subjected to genome sequencing. Furthermore, genome sequencing of NB plants, KS plants,  
267 NBKS hybrids I and II, and their progenies (seedlings obtained from these hybrids) was also  
268 conducted using the information on SNPs. The origin of the sequence read was selectively  
269 identified as an NB- or KS-genome-derived read, and the ratio between NB and KS SNPs  
270 was calculated for each genome (Fig. 6). In the genomes of NBKS hybrids I and II,  
271 heterozygous profiles of SNPs from NB and KS were detected; this suggested the coexistence  
272 of alleles from both NB and KS at the same analyzed SNP-present loci because of the mixing  
273 of genetic material between the two subspecies (NB, KS, and NBKS hybrids I and II in Fig.  
274 6). In contrast, haploid plants regenerated from an egg cell isolated from the NBKS hybrid I  
275 plant showed SNPs homologous at all the investigated loci, confirming that the haploid egg

276 plants were derived from a single gamete after meiosis of megaspore mother cells in NBKS  
277 hybrid I (Haploid in Fig. 6).

278 Moreover, diploid and tetraploid plants, both originating from the same NBKS egg  
279 cell isolated from NBKS hybrid II, displayed the same homozygous patterns of SNPs  
280 throughout the genome (Diploid and Tetraploid in Fig. 6). This indicates that these plants  
281 were doubled and quadrupled haploids originating from the same egg cell, and that genome  
282 duplication occurred once during the formation of diploid NBKS egg-derived plants and  
283 twice during tetraploid plant formation from an NBKS egg cell.

284

### 285 **Transcriptional dynamics in egg cells post-cold treatment**

286 Transcriptomic analysis of egg cells collected at different incubation periods after cold  
287 treatment was conducted to investigate the influence of cold stress on their gene expression  
288 profile. Briefly, isolated NB egg cells were incubated at 4 °C for 12 h or directly sampled for  
289 RNA extraction without cold treatment (C1 and C2 were biological replicates). Furthermore,  
290 the 12-h cold-treated egg cells were transferred from 4 °C and followed without (0h-1 and  
291 0h-2) or with further incubation at 20 °C for 4 (4h-1 and 4h-2) and 12 (12h-1 and 12h-2) h.

292 The correlation between the transcriptomic profiles and incubation period post-cold  
293 treatment was identified via principal component analysis (Fig. 7A), which indicated that  
294 PC1 and PC2 were sufficient to separate these cells into four different groups. C1 and C2 egg  
295 cells were clustered within the range of 0h-1 and 0h-2 egg cells, suggesting that the gene  
296 expression profile of egg cells is not largely affected by cold treatment itself. The  
297 transcriptomic data of egg cells incubated for 0, 4, and 12 h post-cold-treatment were  
298 independently clustered within distinct areas (Fig. 7A). This suggests that gene expression  
299 profiles in egg cells gradually change after release from the cold treatment.

300

301 Pairwise comparisons between untreated and cold-treated egg cells were conducted to  
302 identify DEGs, including upregulated and downregulated genes, induced by cold treatment.  
303 First, we created scatter plots showing upregulated (red dots) and downregulated (blue dots)  
304 DEGs in each post-cold treatment incubation period at 0, 4, and 12 h compared with the  
305 untreated egg cells (Fig. 7B). We observed significant upregulation of 43 genes ( $p < 0.05$ ) in  
306 egg cells without post-cold treatment incubation (0h eggs), 131 genes in egg cells after 4 h  
307 (4h eggs), and 110 genes in egg cells after 12 h of post-cold treatment incubation (12h eggs)  
308 compared with untreated egg cells (Fig. 7B and Supplementary Table 3). According to Gene  
309 Ontology (GO) enrichment analysis, 43 upregulated genes in 0h eggs were enriched in  
310 organic and amino acid catabolism terms (Supplementary Table 1). Studies have reported that  
311 the catabolic pathways of amino acids are activated during and after exposure to abiotic  
312 stresses, as amino acids can be used as precursors for the biosynthesis of secondary  
313 metabolites and signaling molecules that mediate stress response and tolerance to allow stress  
314 recovery and growth resumption (Batista-Silva et al., 2019; Pires et al., 2016). The highly  
315 enriched terms of upregulated genes in 4h eggs were related to chromatin remodeling, DNA  
316 packaging, amino acid metabolism, and heavy metal response (Supplementary Table 1). In  
317 addition, terms related to carbohydrate and nucleotide metabolism, heat stress response, and  
318 protein folding mechanism were enriched in 12h eggs (Supplementary Table 1), indicating  
319 that cold-treated egg cells might attempt to alleviate stress-induced molecular damage in  
320 proteins and DNA by activating protein folding mechanisms and nucleic acid metabolism.

321 We hypothesized that in addition to cold stress-responsive roles, these upregulated  
322 genes might also induce egg cells to undergo fertilization-independent embryogenesis.  
323 Therefore, to identify development-promoting genes among the upregulated DEGs, a  
324 comparative analysis was performed between upregulated genes in cold-treated egg cells and  
325 fertilization-induced genes in zygotes at four hours after gamete fusion (4h zygotes) (Rahman

326 et al., 2019). We found that six genes were commonly upregulated in both 0h cold-treated  
327 egg cells and 4h zygotes (Fig. 7C). GO enrichment analysis showed that five possible stress-  
328 responsive, two protein-binding, and two transferase activity-related terms were enriched in  
329 both 0h cold-treated egg cells and zygotes (Supplementary Table 2). These results suggest  
330 that the early phase of the cellular response to cold treatment and fertilization requires a  
331 similar stress response mechanism, as a zygote also encounters developmental stress through  
332 drastic changes in metabolism and physiology after fertilization. Further, 40 genes that were  
333 commonly upregulated in 4h eggs and 4h zygotes were subjected to GO enrichment analysis  
334 (Fig. 7C). Although the enrichment of GO terms remained related to stress-responsive terms  
335 in 4h cold-treated egg cells and 4h zygotes, the enriched terms gradually shifted to amino  
336 acid metabolism, antioxidant activity, and protein-folding mechanism terms. Interestingly, in  
337 12h cold-treated egg cells and 4h zygotes, among 24 commonly upregulated DEGs, the  
338 highly enriched terms were related to epigenetic regulation of chromatin states and protein-  
339 folding mechanisms (Fig. 7C and Supplementary Table 2), suggesting that expression of  
340 development-related genes might also be epigenetically activated after cold exposure. It was  
341 suggested that autonomous de-repression of chromatin needs to be activated to initiate a  
342 transcriptional reprogramming of egg cells to advance parthenogenesis (reviewed in  
343 Vijverberg, Ozias-Akins, and Schranz 2019). Significant enrichment of genes related to  
344 protein-folding mechanisms probably indicates the reorganization of the proteome and  
345 surveillance of proteins that are misfolded or newly synthesized because of physiological  
346 alteration of egg cells after cold treatment as well as during the conversion of an egg cell into  
347 a zygote.

348 Interestingly, similar to 4h zygotes, we detected an upregulation of the *OsBBML1*  
349 gene in 12h eggs compared with the control, 0h eggs, and 4h eggs, suggesting that  
350 autonomous cell division and development of egg cells exposed to cold stress might be

351 partially induced by the upregulation of the *OsBBML1* gene (Fig. 7C and Supplementary  
352 Table 5). Since the *OsBBML1* expression level in 4h zygotes was significantly higher than  
353 that in 12h cold-treated egg cells (Fig. 7C and Supplementary Table 5), it can be concluded  
354 that some 12h cold-treated egg cells might gradually undergo an initial stage of  
355 embryogenesis, while 4h zygotes may advance towards a more progressive embryonic  
356 stage at which reprogramming of transcriptional activity conferring embryonic development  
357 occurs, and that *de novo OsBBML1* gene expression might play a crucial role in this process.

358 To identify the upregulated and downregulated DEGs in cold-treated egg cells  
359 compared with the untreated cells based on the duration of post-cold treatment incubation, we  
360 created set visualization diagrams that exhibited the transcript sets of continuously  
361 upregulated or downregulated DEGs and assigned them as sets of cold treatment-induced and  
362 suppressed genes, respectively (Fig. 7E, F). For upregulated genes, all up-regulated DEGs  
363 were categorized into 13 groups based on the post-cold treatment incubation period of cold-  
364 treated egg cells and 4h zygotes at which the transcripts were upregulated DEGs compared  
365 with egg cells (Fig. 7E and Supplementary Table 3). Among the 13 groups, we selected five  
366 transcript sets that were continuously upregulated in the cold-treated egg cells at the  
367 incubation period of 0–4h, 4–12h, 0–12h, 12h and 4h zygote, and 4–12h and 4h zygote,  
368 which were classified into the upregulated gene set categories 1–5 (U1–U5), respectively (Fig.  
369 7E and Supplementary Table 3). We speculated that the overlapping upregulated genes  
370 between cold-treated egg cells and zygotes played important roles in inducing autonomous  
371 development of unfertilized egg cells upon induction by cold treatment, as shown by the  
372 categories U4–U5 (Fig. 7E and Supplementary Table 3). Notably, in group U4, we detected  
373 an upregulation of the gene encoding the parthenogenesis-related transcription factor AP-type  
374 ERF34 (*Os04g0550200*) in 12h cold-treated egg cells and 4h zygotes, indicating the possible  
375 role of the *Os04g0550200* gene in promoting both autonomous and zygotic embryogenesis



376 (Fig. 7E and Supplementary Table 3). However, the expression levels of this gene were found  
377 to be significantly higher in 12h eggs than in 4h zygotes (Supplementary Table 3), suggesting  
378 that autonomous development of cold-treated egg cells and zygotes might involve different  
379 pathways to initiate parthenogenetic and zygotic embryogenesis, respectively. For group U5,  
380 the *Os09g0511600* gene, which encodes the glycoside hydrolase family 1 protein, was  
381 continuously upregulated in 4h eggs, 12h eggs, and zygotes (Fig. 7E and Supplementary  
382 Table 3). Microarray data from the RiceXPro database and previous studies have reported  
383 that glycoside hydrolase enzymes, which catalyze the hydrolysis of glycosidic bonds, are  
384 required for the modification and remodeling of cell walls and are preferentially expressed in  
385 growing embryos and actively developing tissues (Sharma et al., 2013). Therefore, the  
386 upregulation of glycoside hydrolase-coding genes suggests that early acquisition of  
387 developmental competence in cold-treated egg cells and zygotes involves cell wall  
388 rearrangement, which is a fundamental factor for plant growth and development.

389 In addition, 12 groups of downregulated DEGs, five transcript sets that were  
390 continuously downregulated in cold-treated egg cells at the incubation period of 0–4h, 4–12h,  
391 0–12h, 12h and 4h zygote, and 4–12h and 4h zygote, were also assigned into five categories  
392 1–5 (D1–D5), respectively (Fig. 7E and Supplementary Table 4). We hypothesized that the  
393 overlapping downregulated genes between cold-treated egg cells and zygotes potentially  
394 suppressed fertilization-independent development and subsequent precocious embryogenesis  
395 in egg cells. Interestingly, based on the average TPM values, *Fertilization Barrier (FEB) 1*  
396 and 2 genes showed a progressive decline in expression levels in cold-treated egg cells;  
397 additionally, downregulation of *FEB1* and 2 expression levels was also detected in 4h zygotes  
398 (Supplementary Table 5) (Anderson et al., 2013). This indicates that dormancy of egg cells is  
399 potentially broken upon exposure to cold stress as well as the entry of sperm nucleus, and that  
400 the pre-fertilization barrier is abolished and embryogenesis is initiated.

401

402 Moreover, we detected six commonly downregulated genes among 12h cold-treated eggs, 4h  
403 zygotes, and parthenogenetically active KS egg cells compared with NB egg cells (Fig. 7G).

404 Notably, downregulation of *Os11t0671000*, a dormancy-associated protein, was observed in  
405 these cell types, suggesting that cold treatment might liberate the quiescent state of egg cells,  
406 thereby triggering parthenogenetic development. Downregulation of *Os05g0584200*, which  
407 encodes late embryogenesis abundant (LEA) protein, might imply that this protein is not  
408 required for early embryogenesis in cold-treated egg cells. This suggests that low LEA levels  
409 in egg cells after cold treatment allow egg cells to gain the ability to initiate early embryonic  
410 development via parthenogenesis.

411

412 **Discussion**

413

414 Fertilization-independent development of female and male gametophytes has previously been  
415 reported to be effectively induced by low-temperature treatment. In this study, we  
416 demonstrated the induction of parthenogenetic development of egg cells isolated from non-  
417 parthenogenetic *japonica* rice.

418 Cold stress exposure is known to be an effective trigger for in vitro parthenogenesis in  
419 the sexual line of a crop plant. Upon exposure to environmental stresses, such as cold stress,  
420 sessile organisms such as plants undergo acclimation to become stress-tolerant, which allows  
421 them to survive, grow, and reproduce through alternative pathways. In several angiosperm  
422 species, the modes of reproduction can be facultative according to environmental conditions.  
423 Switching of the reproductive mode was reported in the alpine plant *Ranunculus kuepferi*  
424 upon exposure to cold stress, as it was observed that cold-treated sexual diploid plants  
425 produced significantly higher numbers of apomictic seeds than warm-treated diploids (Klatt  
426 et al., 2018). This indicates that cold stress induces a change of sexual reproduction into the  
427 reproduction mode by which the formation of asexual seeds via apomixis occurs. In the  
428 present study, we detected the incidence of autonomous cell division and development  
429 induced by cold treatment in egg cells isolated from sexual NB rice plants (Fig. 1 and 2). It is  
430 suggested that spontaneous mitosis after cold treatment in sexual haploid NB egg cells might  
431 be a mechanism to maintain reproductive fitness via parthenogenesis to acclimate to cold  
432 stress, in which both mitosis and meiosis are disrupted (Chen et al., 2011; Thakur et al.,  
433 2010). In addition to stress acclimation, parthenogenetic development is initiated by the  
434 expression of parthenogenesis-promoting genes; herein, we found an upregulation of  
435 *OsBBML1* in egg cells treated with cold stress (Fig. 7B and Supplementary Table 5). This  
436 indicates the synergistic effects of cytological and molecular responses to cold stress in

437 activating adaptation under environmental changes by enhancing growth and reproductive  
438 ability.

439 We also observed the degeneration of egg cells cultured without preceding cold  
440 treatment (Fig. 1), which showed that egg cells cannot develop without the presence of proper  
441 stimuli and signals, such as the entry of a male nucleus or stress conditions. Autonomous  
442 development of cold-treated egg cells suggests that cold stress can act as a sole trigger to  
443 promote fertilization-independent embryogenesis from the isolated NB egg cells, as it was  
444 previously stated that egg cells store mRNA and proteins to prepare for embryonic  
445 development upon fertilization (Brower et al., 1981; Medvedev et al., 2011). Therefore, by  
446 employing the stored molecules, it appears that the presence of a single trigger, such as  
447 environmental stress, is sufficient to initiate embryogenesis of egg cells without the  
448 involvement of sperm cells. In actively proliferating cells, cold stress exposure has  
449 detrimental effects on cell division through spindle microtubule disorganization, and  
450 suppression, and skipping of mitosis (Moh and Alán, 1964; Brinkley and Cartwright, 1975;  
451 Lazareva et al., 2008). Therefore, cold-exposed plant cells take this opportunity to replicate  
452 their genome via endopolyploidy as an adaptation mechanism to initiate cold stress tolerance,  
453 as the resultant polyploid cells can expand in size and later proceed the cell cycle more  
454 effectively under stressful conditions (Scholes and Paige, 2015). However, in the root apical  
455 meristem of maize, the quiescent center is mitotically inactive and exists as a stem cell niche  
456 in a long-lasting halted state of cell division at the G1 phase of the cell cycle (Kerk and  
457 Feldman, 1995). Upon acclimation to cold stress, the quiescent center is triggered to break its  
458 dormancy and divide to replace the damaged cells to recover from the cold stress (Barlow  
459 and Rathfelder, 1985; Clowes and Stewart, 1967). We previously reported that rice egg cells  
460 are arrested at the G1 phase (Sukawa and Okamoto, 2018), and the current study reported that

461 cold treatment might act as a factor that releases the cell cycle arrest in the egg cells, thereby  
462 progressing autonomous cell division without fertilization (Fig. 1).

463 Control of gene expression in response to cold stress can be epigenetically modulated  
464 through alteration of chromatin structure via histone acetylation, methylation, and  
465 phosphorylation (Yuan et al., 2013; Kim et al., 2015). Post-translational modification of H3  
466 and H4 histones via acetylation of lysine residues tends to activate gene expression (Kuo et  
467 al., 1996; Zhang et al., 1999; Shahbazian and Grunstein, 2007). Cold treatment was found to  
468 trigger de-repression of chromatin via histone acetylation, which mediates the transition of  
469 chromatin from repressive to active state through *HOS15*-mediated degradation of histone  
470 deacetylase 2C (Lim et al., 2020). The subsequent hyperacetylation of histones allows  
471 chromatin to become more permissive and triggers the expression of cold-responsive *COR*  
472 genes (Park et al., 2018). Consistent with a previous study, our GO analysis showed that the  
473 highly represented group of upregulated genes in cold-treated egg cells at 4 and 12 h post-  
474 treatment were the genes encoding histone variants related to DNA packaging and  
475 nucleosome organization (Supplementary Table 1). Therefore, exposure to cold temperatures  
476 may trigger the upregulation of genes mediating chromatin reorganization in egg cells as a  
477 possible preparatory mechanism prior to cell division and development. One of the  
478 cytological features of egg cells is that their chromatin is highly condensed and repressive, as  
479 it possesses a large number of repressive histone marks, like H3K9Me2 (Fang et al., 2021).  
480 Our GO analysis results revealed a common enrichment of genes involved in epigenetic  
481 regulation in both cold-treated egg cells and 4h zygotes (Supplementary Table 1). Cold stress  
482 acclimation via chromatin structure modification mediated by epigenetic mechanisms might  
483 occur during post-treatment adaptation of cold-treated egg cells, leading to de-repression and  
484 activation of chromatin containing the genes that might be involved in promoting  
485 parthenogenesis.

486 Parthenogenesis is generally coupled with the restoration of the diploid number of  
487 chromosomes to affirm the viability and fertility of parthenogenetic individuals (Koltunow  
488 and Grossniklaus, 2003). Upon exposure to environmental stresses, somatic tissues in various  
489 angiosperms acquire endopolyploidy by undergoing endoreduplication without mitosis,  
490 resulting in cells with higher ploidy levels and larger sizes (Kondorosi et al., 2000; Scholes  
491 and Paige, 2015). Endopolyploidy is activated to promote the survival of plants in response to  
492 cold and environmental stresses by increasing the growth rate and metabolite storage capacity  
493 in proliferative tissues (Gegas et al., 2014; Klatt et al., 2018; Pacey et al., 2020). Notably, the  
494 results of our nuclear DNA assessment indicated that egg cells treated with cold temperature  
495 showed genomic DNA duplication, causing the transition of parthenogenetically proliferative  
496 egg cells from the haploid to diploid state at the early stage of fertilization-independent egg  
497 development (Fig. 4). A possible explanation for this is that cold stress might activate the  
498 switching of reproductive mode in egg cells from sexuality to parthenogenesis (Klatt et al.,  
499 2018). Therefore, the parthenogenetic egg cells undergo endopolyploidy to improve the  
500 survival of the subsequent egg-derived plants, as diploid and tetraploid egg plants were larger  
501 and more fertile than haploid egg plants (Fig. 3H–J, Supplementary Fig. 2 and Table 2).

502 Upon cold stress-induced parthenogenetic development, egg cells developed into  
503 white cell colonies and then calli with multiple green shoots, which were later regenerated  
504 into plantlets (Fig. 2). Interestingly, we often detected a variation in ploidy levels in plants  
505 regenerated from the same calli, and the number of resultant diploid and tetraploid plants was  
506 almost 1:1 (Table 2). This indicates that endopolyploidy occurs once again during callus  
507 proliferation and regeneration, and that the transition from diploid to tetraploid state begins at  
508 the late stage of parthenogenetic development of egg cells (Fig. 2 and Table 2). A previous  
509 study revealed that the induction of shoot and root regeneration in the presence of  
510 phytohormones, auxin and cytokinin, is known to cause endoreduplication and increased

511 ploidy levels in the regenerates (Liscum and Hangarter, 1991). In addition, there is direct  
512 evidence of ploidy dynamics resulting from endopolyploidy in regenerating calli cultured on  
513 solid media that convert diploid cells into tetraploid cells (Murashige and Nakano, 1967;  
514 Torrey, 1967). However, the studies were conducted with cultivation of calli over a period of  
515 years, while the regeneration of calli into plantlets in our system only required days (Fig. 2).  
516 Therefore, it remains inconclusive whether the purpose of genome duplication via  
517 endopolyploidy in proliferating calli was to improve fitness in parthenogenetic individuals or  
518 to tolerate culture stresses. Notably, the same homozygous patterns of SNPs throughout the  
519 genome of egg-derived diploid and tetraploid plants indicated that these plants were doubled  
520 and quadrupled haploid because of endopolyploidy (Fig. 6). As weaker and infertile  
521 phenotypes were observed in haploid plants regenerated from egg cells (Supplementary Fig.  
522 2), it can be suggested that endopolyploidy is required in cold-treated egg cells to switch the  
523 reproduction mode from sexuality to parthenogenesis to enhance viability and fertility during  
524 in vitro cultivation.

525         It has been previously indicated that the production of unreduced egg cells by  
526 apomeiosis and parthenogenesis is normally co-segregated (Asker and Jerling, 1992).  
527 However, this study revealed that genome duplication and parthenogenetic development are  
528 independent of each other, and these events do not occur simultaneously in in vitro cultured  
529 egg cells, as we found that the endoreduplication of egg-derived individuals occurs after the  
530 induction of parthenogenesis by cold treatment.

531         Previous reports regarding parthenogenesis in flowering plants have always involved  
532 apomictic seed formation, whereby embryos are derived from unreduced egg cells resulting  
533 from apomeiosis, which produces genetically identical offspring (Koltunow and Grossniklaus,  
534 2003). In this study, we provide new insights into the production of plants directly from  
535 haploid egg cells derived from meiosis without apomeiotic events; hence, the plants

536 regenerated from these egg cells are genetically variable from the mother because of genetic  
537 recombination during meiosis. Therefore, egg-derived progeny with variable traits can be  
538 obtained without genetic contributions from the male parent, and offspring with desired traits  
539 can be obtained through further selection. Furthermore, as cold treatment is known to be  
540 beneficial for fertilization-independent embryogenesis derived from reproductive structures  
541 (Sibi et al., 2001; Gürel et al., 2000), exposure to low temperatures prior to in vitro culture of  
542 isolated egg cells may be a potential technique to physically induce the generation of desired  
543 crop plants from unfertilized gametes.

544



## 545 **Materials and Methods**

546

### 547 **Plant materials and cultures of the isolated egg cells exposed to cold temperature**

548 *Oryza sativa* L. cv. Nipponbare (NB), *O. sativa* L. cv. Kasalath (KS) and NB-KS hybrid rice  
549 plants were grown in an environmental chamber (K30-7248; Koito Industries, Yokohama,  
550 Japan) at 26 °C under a 13 h light/11 h dark photoperiod. To visualize the nuclei in egg cells  
551 and multicellular structures, transformed KS rice plants expressing H2B-GFP were prepared  
552 as previously described (Abiko et al., 2013). Egg cells were isolated from rice flowers as  
553 previously described (Uchiumi et al., 2006, 2007). To investigate cold treatment-induced  
554 parthenogenesis, isolated egg cells were incubated with or without cold treatment at 4 °C for  
555 12 h and subsequently cultured in N6Z medium.

556 To create NB-KS hybrid plants, an NB egg cell was fertilized with a KS sperm cell  
557 using electrofusion, as described previously (Uchiumi et al., 2007). The resultant NB-KS  
558 hybrid zygotes were cultured into plantlets and termed NBKS hybrids. Egg cells were  
559 isolated from the NBKS hybrid and subsequently incubated with or without cold pretreatment  
560 (4 °C for 12 h). The incubated egg cells were then cultured in the N6Z medium.

561

### 562 **Microscopic observation**

563 Cellular features and developmental profiles of the egg cells and parthenogenetic  
564 multicellular structures were observed using a BX-71 inverted microscope (Olympus, Tokyo,  
565 Japan). Digital images of egg cells and the resultant multicellular structures were obtained  
566 using a cooled charge-coupled device camera (Penguin 600CL; Pixcera, CA, USA) and the  
567 InStudio software (Pixcera). In addition to the BX-71 inverted fluorescence microscope, egg  
568 cells and multicellular structures expressing green fluorescent protein (GFP) fusion proteins  
569 or stained with fluorescent probes were observed using an LSM 710 CLS microscope (Carl

570 Zeiss, Jena, Germany), with excitation and emission wavelengths specific to each type of  
571 fluorophores as described below. The intracellular fluorescent signal of H2B-GFP proteins  
572 was observed under a BX-71 inverted fluorescence microscope (Olympus) at 460–490-nm  
573 excitation and 510–550-nm emission wavelengths (U-MWIBA2 mirror unit; Olympus). To  
574 quantify the relative DNA amount in the cells of parthenogenetic multicellular structure using  
575 mDAPI (Sukawa and Okamoto, 2018), the fluorescent signal of the nuclei of egg cells and  
576 multicellular structures at 2-celled, 4- to 8-celled, and 10- to 20-celled stages were stained  
577 with mDAPI and observed using the BX-71 inverted microscope (Olympus) with 360–370-  
578 nm excitation and 420–460-nm emission wavelengths (U-MNUA mirror unit; Olympus).

579

#### 580 **Quantification of the relative amount of nuclear DNA in egg cells and** 581 **parthenogenetically developed multicellular structures**

582 The isolated NB egg cells and multicellular structures at 2-celled, 4- to 8-celled, and 10- to  
583 20-celled stages were subjected to DNA staining using the mDAPI method as previously  
584 described (Sukawa and Okamoto, 2018). Briefly, the egg cells and multicellular structures  
585 were placed in staining droplets containing a mixture of nuclear extraction buffer and DAPI  
586 at a ratio of 1:5 and incubated for 2 min. The cells were then observed under a BX-71  
587 inverted microscope (Olympus) and the fluorescence intensity was quantified using ImageJ  
588 software.

589

#### 590 **Flow cytometry analysis**

591 The nuclear DNA content (ploidy level) of plants regenerated from cold-treated egg cells was  
592 measured with flow cytometry using CyFlow CCA (Partec, Muenster, Germany) and a  
593 QuantumStain NA UV2 Kit (Quantum Analysis, Muenster, Germany). Fresh leaves (22–25  
594 mm<sup>2</sup>) were chopped with a sharp razor in 100  $\mu$ l of the kit solution, and 100  $\mu$ l more was

595 added after chopping. The samples were incubated for 5 min, and the crushed tissue  
596 suspension was filtered through a 30  $\mu$ m nylon mesh (Partec). The samples were subsequently  
597 loaded into a ploidy analyzer. Leaf samples from diploid wild-type NB plants ( $2n = 24$ ,  
598 *Oryza sativa* L. cv NB) were used as the internal controls. Fluorescence intensities were  
599 measured and plotted in real-time. The peak and mean values were calculated using the  
600 FloMax software.

601

### 602 **Preparation of genomic DNA for whole-genome resequencing**

603 Leaf samples derived from NB, KS, NBKS hybrids I and II, NBKS hybrids I and II  
604 recombinant progeny, NBKS hybrid I egg-derived haploid, and NBKS hybrid II egg-derived  
605 diploid and tetraploid plants were collected. Approximately 200 mg of leaf material was  
606 ground in liquid nitrogen, and the resultant powder was transferred and redissolved in lysis  
607 buffer provided by the Nucleospin Plant II kit (Macherey-Nagel, Clontech, CA, USA).  
608 Genome isolation was performed according to the manufacturer's instructions. After eluting  
609 the purified genomic DNA, its quality and quantity were verified using a Nanodrop 2000.  
610 Genomic library construction was performed using the Nextera DNA Flex Library Prep kit  
611 (Illumina, San Diego, CA, USA) according to the manufacturer's instructions. Thereafter, the  
612 obtained genomic libraries were purified with Agencourt AMPure XP and subjected to  
613 quantity and quality determination using a Qubit 3 Fluorometer with a Qubit dsDNA HS  
614 Assay Kit (Thermo Fisher Scientific, Inc., Waltham, MA, USA) and an Agilent 2100  
615 BioAnalyzer with a high-sensitivity DNA chip (Agilent Technologies, Santa Clara, CA,  
616 USA). After checking the quality and quantity of the purified libraries, 150-bp paired-end  
617 reads were generated on an Illumina HiSeq platform (Illumina) with an average depth of  
618 approximately 20-fold coverage for each sample at Macrogen-Japan (Tokyo, Japan).

619

## 620 **Calculation of SNP counts in genomic sequences from the KS and NB genomes**

621 The quality of Illumina reads was evaluated using FastQC (v0.11.8) (Simon). Preprocessing  
622 of the reads included removing the adapter and low-quality sequences was conducted using  
623 Cutadapt (v2.10) (Martin, 2011). The remaining reads were mapped to the NB genome  
624 sequences (Os-Nipponbare-Reference-IRGSP-1.0) available at the Rice Annotation Project  
625 Database (RAP-DB) (Sakai et al., 2013; Kawahara et al., 2013) using BWA (v0.7.17) (Li and  
626 Durbin, 2009). PCR duplications were marked with Picard Toolkit  
627 (<https://broadinstitute.github.io/picard/>), then variant calling was performed by GATK  
628 (v4.2.2.0) (Auwera and O'Connor, 2020). The detected variants were filtered using VCFtools  
629 (v0.1.16) (Danecek et al., 2011) with the following options: ‘—minDP 10’ and ‘—max-  
630 missing 1’. Genotyping was performed using an R package, UPDOG (v2.0.2) (Gerard et al.,  
631 2018) and high-confidence SNPs were selected ( $\text{prop\_mis} < 0.05$ ).

632

## 633 **Preparation of lysates from cold-treated egg cells for mRNA sequencing**

634 Isolated NB egg cells were incubated at 4 °C for 12 h or directly sampled for RNA extraction  
635 without cold treatment. Subsequently, the 12-h cold-treated egg cells were transferred from  
636 4 °C and followed without or with further incubation at 20 °C for 4 and 12 h. Two  
637 independent biological replicates of 8–10 egg cells derived from each condition were  
638 subjected to RNA extraction. Isolated egg cells with or without cold treatment were  
639 transferred to mannitol droplets, and adjusted the osmolarity to 370 mOsmol kg<sup>-1</sup> H<sub>2</sub>O on  
640 coverslips. The egg cells were washed three times by transferring them to fresh droplets of  
641 mannitol solution. After washing, each egg cell sample was transferred to a lysis buffer  
642 supplied in the SMART-Seq HT kit (Takara Bio, Shiga, Japan). The lysates were  
643 immediately used for cDNA synthesis or frozen in liquid nitrogen and stored at -80 °C.  
644 Thereafter, cDNA was synthesized and amplified, and libraries were constructed.

## 645 **cDNA synthesis and library preparation**

646 cDNA preparation and library construction were performed as previously described (Deushi  
647 et al., 2021). Briefly, cDNA was synthesized and amplified from cell lysates using a  
648 SMART-Seq HT Kit (Takara Bio) according to the manufacturer's instructions. The resulting  
649 amplified cDNA was purified using Agencourt AMPure XP (Beckman Coulter, Brea, CA,  
650 USA). The quality and quantity of the purified cDNA were determined using a Qubit 3  
651 Fluorometer with a Qubit dsDNA HS Assay Kit (Thermo Fisher Scientific) and an Agilent  
652 2100 BioAnalyzer with a high-sensitivity DNA chip (Agilent Technologies). Sequencing  
653 libraries were prepared from the amplified cDNA using the Nextera XT DNA Library Prep  
654 Kit (Illumina) according to the SMART-Seq HT Kit instruction manual, after which they  
655 were purified using Agencourt AMPure XP. After checking the quality and quantity of the  
656 purified libraries using the above-mentioned procedures for the purified cDNA, the prepared  
657 libraries were sequenced on an Illumina HiSeq platform (Illumina) at MacroGen-Japan  
658 (Tokyo, Japan) to produce 150-bp paired-end reads.

659

## 660 **Analysis of transcriptome data**

661 The quality of Illumina reads was evaluated using FastQC (v0.11.8) (Simon). Preprocessing  
662 of the reads included removing the adapter, poly-A, and low-quality sequences was  
663 conducted using Cutadapt (v2.10) (Martin, 2011). The remaining high-quality reads were  
664 mapped to the NB transcript sequences (version IRGSP-1.0) available at the Rice Annotation  
665 Project Database (RAP-DB) (Sakai et al., 2013; Kawahara et al., 2013), and the TPM was  
666 calculated using RSEM (v1.3.1) (Li and Dewey, 2011) with Bowtie2 (v 2.3.5.1) (Langmead  
667 and Salzberg, 2012). The differentially expressed genes (DEGs) between the untreated and  
668 cold-treated egg cells derived from different post-cold treatment incubation periods were  
669 detected using an R package, TCC (Sun et al., 2013). Genes with a false discovery rate (FDR;

670 q-value)  $<0.05$  were extracted as DEGs. Set visualization of the overlapping DEGs based on  
671 the time of 20 °C-incubation after cold treatment and zygotes(Rahman et al., 2019) was  
672 generated using the UpsetR package (Conway et al., 2017), part of the R software. The data  
673 were statistically analyzed using a hypergeometric test in ShinyGO v0.66 (Ge, 2020).  
674

675 **Acknowledgements**

676 We thank Ms. T. Mochizuki (Tokyo Metropolitan University) for isolating rice egg cells, Mr.  
677 D. Akasaka for providing transgenic rice plants (cv. Kasalath) (Tokyo Metropolitan  
678 University) and the RIKEN Bio Resource Center (Tsukuba, Japan) for providing cultured rice  
679 cells (Oc line). We would also like to thank Dr. A. Kinoshita and Dr. E. Toda for providing  
680 valuable advice on R-software operation. Computations were partially performed on the NIG  
681 supercomputer at the ROIS National Institute of Genetics.

682

683 **Author contributions**

684 K.R. K.T. and T.O. designed the experiments; K.R. performed most of the experiments; K.T.  
685 performed nuclear DNA quantification using mDAPI staining and cold-treated egg cell  
686 developmental profile monitoring, respectively. S.K. and K.Y. performed analyses of SNPs  
687 and transcriptome data; K.R. and T.O. conceived the project and wrote the article.

688

689 **Funding**

690 This work was supported, in part, by the JSPS KAKENHI (Grant-in-Aid for Challenging  
691 Exploratory Research, Grant No. 20K21317 and Grant-in-Aid for Scientific Research(B),  
692 Grant Nos. 22H02315 to T.O. and K.Y., respectively), and by NEDO (Grant No. 20001505-0  
693 to T.O.). This work was also supported in part by the Research Funding for the  
694 Computational Software Supporting Program of Meiji University.

695

696

697 **References**

698

699 **Abiko, M., Maeda, H., Tamura, K., Hara-Nishimura, I., and Okamoto, T.** (2013). Gene  
700 expression profiles in rice gametes and zygotes: Identification of gamete-enriched genes  
701 and up-or down-regulated genes in zygotes after fertilization. *J. Exp. Bot.* **64**: 1927–  
702 1940.

703 **Anderson, S.N., Johnson, C.S., Jones, D.S., Conrad, L.J., Gou, X., Russell, S.D., and**  
704 **Sundaresan, V.** (2013). Transcriptomes of isolated *Oryza sativa* gametes characterized  
705 by deep sequencing: Evidence for distinct sex-dependent chromatin and epigenetic states  
706 before fertilization. *Plant J.* **76**: 729–741.

707 **Asker, S.E. and Jerling, L.** (1992). *Apomixis in Plants* 1st ed. (CRC press: Boca Raton, FL).

708 **Auwers, G.A. Van der and O'Connor, B.D.** (2020). *Genomics in the Cloud* (O'Reilly  
709 Media, Inc.).

710 **Avise, J.C.** (2008). *Clonality: The Genetics, Ecology and Evolution of Sexual Abstinence in*  
711 *Vertebrate Animals* (Oxford University Press: Oxford).

712 **Barlow, P.W. and Rathfelder, E.L.** (1985). Cell division and regeneration in primary root  
713 meristems of *Zea mays* recovering from cold treatment. *Environ. Exp. Bot.* **25**: 303–314.

714 **Baroux, C. and Grossniklaus, U.** (2015). Chapter Ten - The Maternal-to-Zygotic Transition  
715 in Flowering Plants: Evidence, Mechanisms, and Plasticity. *Curr. Top. Dev. Biol.* **113**:  
716 351–371.

717 **Batista-Silva, W., Heinemann, B., Rugen, N., Nunes-Nesi, A., Araújo, W.L., Braun, H.P.,**  
718 **and Hildebrandt, T.M.** (2019). The role of amino acid metabolism during abiotic stress  
719 release. *Plant Cell Environ.* **42**: 1630–1644.

720 **Brinkley, B.R. and Cartwright, J.** (1975). Cold-Labile and Cold-Stable Microtubules in the  
721 Mitotic Spindle of Mammalian Cells. *Ann. N. Y. Acad. Sci.* **253**: 428–439.

722 **Brower, P.T., Gizang, E., Boreen, S.M., and Schultz, R.M.** (1981). Biochemical studies of  
723 mammalian oogenesis: synthesis and stability of various classes of RNA during growth  
724 of the mouse oocyte in vitro. *Dev. Biol.* **86**: 373–383.

725 **Chen, J., Strieder, N., Krohn, N.G., Cyprys, P., Sprunck, S., Engelmann, J.C., and**  
726 **Dresselhaus, T.** (2017). Zygotic genome activation occurs shortly after fertilization in  
727 maize. *Plant Cell* **29**: 2106–2125.

728 **Chen, N., Xu, Y., Wang, X., Du, C., Du, J., Yuan, M., Xu, Z., and Chong, K.** (2011).  
729 *OsRAN2*, essential for mitosis, enhances cold tolerance in rice by promoting export of  
730 intranuclear tubulin and maintaining cell division under cold stress. *Plant, Cell Environ.*



- 731           **34**: 52–64.
- 732   **Clowes, F.A.L. and Stewart, H.E.** (1967). Recovery From Dormancy in Roots. *New Phytol.*  
733           **66**: 115–123.
- 734   **Conner, J.A., Mookkan, M., Huo, H., Chae, K., and Ozias-Akins, P.** (2015). A  
735           parthenogenesis gene of apomict origin elicits embryo formation from unfertilized eggs  
736           in a sexual plant. *Proc. Natl. Acad. Sci. U. S. A.* **112**: 11205–11210.
- 737   **Conner, J.A., Podio, M., and Ozias-Akins, P.** (2017). Haploid embryo production in rice  
738           and maize induced by PsASGR-BBML transgenes. *Plant Reprod.* **30**: 41–52.
- 739   **Conway, J.R., Lex, A., and Gehlenborg, N.** (2017). Genome analysis UpSetR : an R  
740           package for the visualization of intersecting sets and their properties. **33**: 2938–2940.
- 741   **Danecek, P. et al.** (2011). The variant call format and VCFtools. **27**: 2156–2158.
- 742   **Deushi, R., Toda, E., Koshimizu, S., Yano, K., and Okamoto, T.** (2021). Effect of Paternal  
743           Genome Excess on the Developmental and. *Plants*: 1–13.
- 744   **Fang, H., Shao, Y., and Wu, G.** (2021). Reprogramming of Histone H3 Lysine Methylation  
745           During Plant Sexual Reproduction. *Front. Plant Sci.* **12**: 1–17.
- 746   **Garcia-Aguilar, M., Michaud, C., Leblanc, O., and Grimanelli, D.** (2010). Inactivation of  
747           a DNA methylation pathway in maize reproductive organs results in apomixis-like  
748           phenotypes. *Plant Cell* **22**: 3249–3267.
- 749   **Ge, S.X.** (2020). ShinyGO : a graphical gene-set enrichment tool for animals and plants. **36**:  
750           2628–2629.
- 751   **Gegas, V.C., Wargent, J.J., Pesquet, E., Granqvist, E., Paul, N.D., and Doonan, J.H.**  
752           (2014). Endopolyploidy as a potential alternative adaptive strategy for Arabidopsis leaf  
753           size variation in response to UV-B. *J. Exp. Bot.* **65**: 2757–2766.
- 754   **Gerard, D., Felipe, L., Ferrão, V., Augusto, A., and Garcia, F.** (2018). Genotyping  
755           Polyploids from Messy Sequencing Data. **210**: 789–807.
- 756   **Gürel, S., Gürel, E., and Kaya, Z.** (2000). Doubled haploid plant production from  
757           unpollinated ovules of sugar beet (*Beta vulgaris* L.). *Plant Cell Rep.* **19**: 1155–1159.
- 758   **Hand, M.L. and Koltunow, A.M.G.** (2014). The genetic control of apomixis: Asexual seed  
759           formation. *Genetics* **197**: 441–450.
- 760   **Kawahara, Y. et al.** (2013). Improvement of the *Oryza sativa* Nipponbare reference genome  
761           using next generation sequence and optical map data.: 1–10.
- 762   **Kerk, N.M. and Feldman, L.J.** (1995). A biochemical model for the initiation and  
763           maintenance of the quiescent center: Implications for organization of root meristems.  
764           *Development* **121**: 2825–2833.

- 765 **Khanday, I., Skinner, D., Yang, B., Mercier, R., and Sundaresan, V.** (2019). A male-  
766 expressed rice embryogenic trigger redirected for asexual propagation through seeds.  
767 *Nature* **565**: 91–95.
- 768 **Kim, J.M., Sasaki, T., Ueda, M., Sako, K., and Seki, M.** (2015). Chromatin changes in  
769 response to drought, salinity, heat, and cold stresses in plants. *Front. Plant Sci.* **6**: 1–12.
- 770 **Klatt, S., Schinkel, C.C.F., Kirchheimer, B., Dullinger, S., and Hörandl, E.** (2018).  
771 Effects of cold treatments on fitness and mode of reproduction in the diploid and  
772 polyploid alpine plant *Ranunculus kuepferi* (Ranunculaceae). *Ann. Bot.* **121**: 1287–1298.
- 773 **Koltunow, A.M. and Grossniklaus, U.** (2003). Apomixis: A Developmental Perspective.  
774 *Annu. Rev. Plant Biol.* **54**: 547–574.
- 775 **Kondorosi, E., Roudier, F., and Gendreau, E.** (2000). Plant cell-size control: Growing by  
776 ploidy? *Curr. Opin. Plant Biol.* **3**: 488–492.
- 777 **Kumlehn, J., Kirik, V., Czihal, A., Altschmied, L., Matzk, F., Lörz, H., and Bäumllein, H.**  
778 (2001). Parthenogenetic egg cells of wheat: Cellular and molecular studies. *Sex. Plant*  
779 *Reprod.* **14**: 239–243.
- 780 **Kuo, M.H., Brownell, J.E., Sobel, R.E., Ranalli, T.A., Cook, R.G., Edmondson, D.G.,**  
781 **Roth, S.Y., and Allis, C.D.** (1996). Transcription-linked acetylation by Gcn5p of  
782 histones H3 and H4 at specific lysines. *Nature* **383**: 269–272.
- 783 **Langmead, B. and Salzberg, S.L.** (2012). Fast gapped-read alignment with Bowtie 2. **9**:  
784 357–360.
- 785 **Lazareva, E.M., Chentsov, Y.S., and Smirnova, E.A.** (2008). The effect of low  
786 temperature on the microtubules in root meristem cells of spring and winter cultivars of  
787 wheat *Triticum aestivum* L. *Cell tissue biol.* **2**: 436–450.
- 788 **Li, B. and Dewey, C.N.** (2011). RSEM : accurate transcript quantification from RNA-Seq  
789 data with or without a reference genome.
- 790 **Li, H. and Durbin, R.** (2009). Fast and accurate short read alignment with Burrows –  
791 Wheeler transform. **25**: 1754–1760.
- 792 **Lim, C.J. et al.** (2020). The Histone-modifying complex PWR/HOS15/HD2C epigenetically  
793 regulates cold tolerance1[OPEN]. *Plant Physiol.* **184**: 1097–1111.
- 794 **Liscum, E. and Hangarter, R.P.** (1991). Manipulation of Ploidy Level in Cultured Haploid  
795 *Petunia* Tissue by Phytohormone Treatments. *J. Plant Physiol.* **138**: 33–38.
- 796 **Liu, X.-Q., Shi, J.-J., Fan, H., Jiao, J., Gao, L., Tan, L., Nagawa, S., and Wang, D.-Y.**  
797 (2020). Nuclear DNA replicates during zygote development in *Arabidopsis* and *Torenia*  
798 *fournieri*. *Plant Physiol.*: 137–145.

- 799 **Martin, M.** (2011). Cutadapt removes adapter sequences from high-throughput sequencing  
800 reads. *EMBnet* **17**: 10–12.
- 801 **Medvedev, S., Pan, H., and Schultz, R.M.** (2011). Absence of MSY2 in mouse oocytes  
802 perturbs oocyte growth and maturation, RNA stability, and the transcriptome. *Biol.*  
803 *Reprod.* **85**: 575–583.
- 804 **Mogensen, H.L. and Holm, P.B.** (1995). Dynamics of nuclear DNA quantities during  
805 zygote development in barley. *Plant Cell* **7**: 487–494.
- 806 **Moh, C.C. and Alán, J.J.** (1964). The Effect of Low Temperature on Mitosis in the Root  
807 Tips of Beans. *Caryologia* **17**: 409–415.
- 808 **Murashige, T. and Nakano, R.** (1967). Chromosome Complement as a Determinant of the  
809 Morphogenic Potential of Tobacco Cells. *Am. J. Bot.* **54**: 963.
- 810 **Pacey, E.K., Maherali, H., and Husband, B.C.** (2020). Endopolyploidy is associated with  
811 leaf functional traits and climate variation in *Arabidopsis thaliana*. *Appl. Plant Sci.* **107**:  
812 993–1003.
- 813 **Park, J. et al.** (2018). Epigenetic switch from repressive to permissive chromatin in response  
814 to cold stress. *Proc. Natl. Acad. Sci. U. S. A.* **115**.
- 815 **Pillot, M., Baroux, C., Vazquez, M.A., Autran, D., Leblanc, O., Vielle-Calzada, J.P.,**  
816 **Grossniklaus, U., and Grimanelli, D.** (2010). Embryo and endosperm inherit distinct  
817 chromatin and transcriptional states from the female gametes in *Arabidopsis*. *Plant Cell*  
818 **22**: 307–320.
- 819 **Pires, M. V., Pereira Júnior, A.A., Medeiros, D.B., Daloso, D.M., Pham, P.A., Barros,**  
820 **K.A., Engqvist, M.K.M., Florian, A., Krahnert, I., Maurino, V.G., Araújo, W.L.,**  
821 **and Fernie, A.R.** (2016). The influence of alternative pathways of respiration that  
822 utilize branched-chain amino acids following water shortage in *Arabidopsis*. *Plant Cell*  
823 *Environ.* **39**: 1304–1319.
- 824 **Pulido, A., Bakos, F., Devic, M., Barnabás, B., and Olmedilla, A.** (2009). HvPG1 and  
825 ECA1: Two genes activated transcriptionally in the transition of barley microspores  
826 from the gametophytic to the embryogenic pathway. *Plant Cell Rep.* **28**: 551–559.
- 827 **Pupilli, F. and Barcaccia, G.** (2012). Cloning plants by seeds: Inheritance models and  
828 candidate genes to increase fundamental knowledge for engineering apomixis in sexual  
829 crops. *J. Biotechnol.* **159**: 291–311.
- 830 **Rahman, M.H., Toda, E., Kobayashi, M., Kudo, T., Koshimizu, S., Takahara, M.,**  
831 **Iwami, M., Watanabe, Y., Sekimoto, H., Yano, K., and Okamoto, T.** (2019).  
832 Expression of genes from paternal alleles in rice zygotes and involvement of OsASGR-

- 833 BBML1 in initiation of zygotic development. *Plant Cell Physiol.* **60**: 725–737.
- 834 **Sailer, C., Schmid, B., and Grossniklaus, U.** (2016). Apomixis allows the transgenerational  
835 fixation of phenotypes in hybrid plants. *Curr. Biol.* **26**: 331–337.
- 836 **Sakai, H. et al.** (2013). Rice Annotation Project Database ( RAP-DB ): An Integrative and  
837 Interactive Database for Rice Genomics Special Focus Issue – Databases. **54**.
- 838 **Scholes, D.R. and Paige, K.N.** (2015). Plasticity in ploidy: A generalized response to stress.  
839 *Trends Plant Sci.* **20**: 165–175.
- 840 **Shahbazian, M.D. and Grunstein, M.** (2007). Functions of Site-Specific histone acetylation  
841 and deacetylation. *Annu. Rev. Biochem.* **76**: 75–100.
- 842 **Sharma, R., Cao, P., Jung, K.H., Sharma, M.K., and Ronald, P.C.** (2013). Construction  
843 of a rice glycoside hydrolase phylogenomic database and identification of targets for  
844 biofuel research. *Front. Plant Sci.* **4**: 1–15.
- 845 **Sibi, M.L., Kobaissi, A., and Shekafandeh, A.** (2001). Green haploid plants from  
846 unpollinated ovary culture in tetraploid wheat (*Triticum durum* Defs.). *Euphytica* **122**:  
847 351–359.
- 848 **Simon, A.** FastQC: A Quality Control Tool for High Throughput Sequence Data.
- 849 **Sukawa, Y. and Okamoto, T.** (2018). Cell cycle in egg cell and its progression during  
850 zygotic development in rice. *Plant Reprod.* **31**: 107–116.
- 851 **Sun, J., Nishiyama, T., Shimizu, K., and Kadota, K.** (2013). TCC : an R package for  
852 comparing tag count data with robust normalization strategies TCC : an R package for  
853 comparing tag count data with robust normalization strategies.
- 854 **Thakur, P., Kumar, S., Malik, J.A., Berger, J.D., and Nayyar, H.** (2010). Cold stress  
855 effects on reproductive development in grain crops: An overview. *Environ. Exp. Bot.*  
856 **67**: 429–443.
- 857 **Toki, S., Hara, N., Ono, K., Onodera, H., Tagiri, A., Oka, S., and Tanaka, H.** (2006).  
858 Early infection of scutellum tissue with *Agrobacterium* allows high-speed  
859 transformation of rice. *Plant J.* **47**: 969–976.
- 860 **Torrey, J.G.** (1967). Morphogenesis in Relation to Chromosomal Constitution in Long-term  
861 Plant Tissue Cultures. *Physiol. Plant.* **20**: 265–275.
- 862 **Tsunewaki, K. and Mukai, Y.** (1990). Wheat Haploids Through the Salmon Method. **13**:  
863 460–478.
- 864 **Uchiumi, T., Komatsu, S., Koshiba, T., and Okamoto, T.** (2006). Isolation of gametes and  
865 central cells from *Oryza sativa* L. Sex. *Plant Reprod.* **19**: 37–45.
- 866 **Uchiumi, T., Uemura, I., and Okamoto, T.** (2007). Establishment of an in vitro fertilization

- 867 system in rice (*Oryza sativa* L.). *Planta* **226**: 581–589.
- 868 **Underwood, C.J. et al.** (2022). A PARTHENOGENESIS allele from apomictic dandelion  
869 can induce egg cell division without fertilization in lettuce. *Nat. Genet.* **54**: 84–93.
- 870 **Vijverberg, K., Ozias-Akins, P., and Schranz, M.E.** (2019). Identifying and engineering  
871 genes for parthenogenesis in plants. *Front. Plant Sci.* **10**.
- 872 **Wuest, S.E., Vijverberg, K., Schmidt, A., Weiss, M., Gheyselinck, J., Lohr, M., Wellmer,**  
873 **F., Rahnenführer, J., von Mering, C., and Grossniklaus, U.** (2010). Arabidopsis  
874 Female Gametophyte Gene Expression Map Reveals Similarities between Plant and  
875 Animal Gametes. *Curr. Biol.* **20**: 506–512.
- 876 **Yuan, L., Liu, X., Luo, M., Yang, S., and Wu, K.** (2013). Involvement of histone  
877 modifications in plant abiotic stress responses. *J. Integr. Plant Biol.* **55**: 892–901.
- 878 **Zhang, W., Bone, J.R., Edmondson, D.G., Turner, B.M., Roth, S.Y., and Annunziato,**  
879 **A.T.** (1999). Essential and redundant functions of histone acetylation revealed by  
880 mutation of target lysines and loss of Gcn5p acetyltransferase. *Chemtracts* **12**: 748–754.
- 881

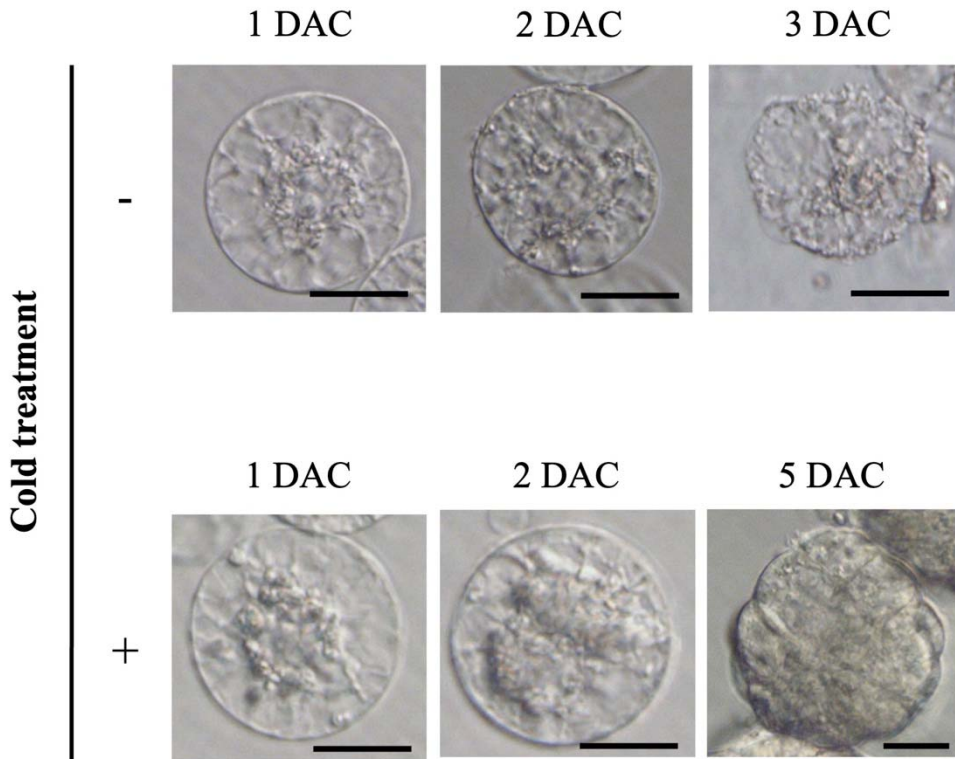

**Figure 1. Autonomous cell division profile of isolated NB egg cells cultured with or without preceding 12-h cold treatment.**

Minus (-) and plus (+) signs indicate egg cells cultured without or with preceding cold treatment for 12 h, respectively. Scale bars: 20  $\mu$ m.

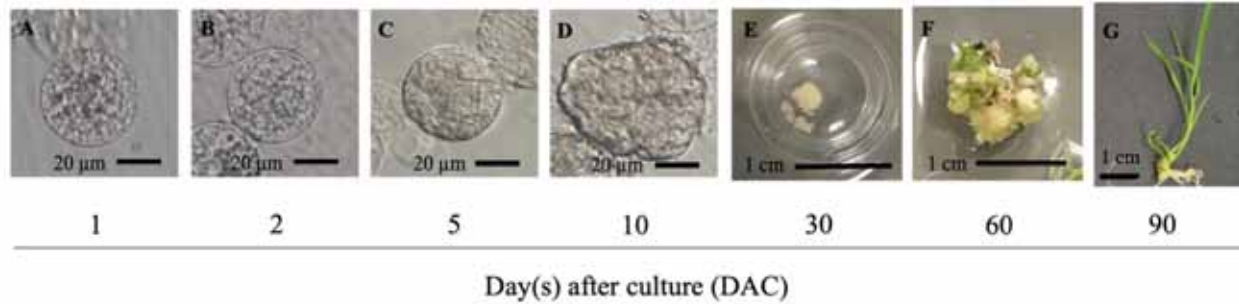

**Figure 2. Development and regeneration plantlets developed from isolated NB egg cells exposed to 12 h-cold treatment before cultivation in growth and regeneration media.**

(A) Cold-treated egg cells remained in a single-celled stage one day after culture (DAC). (B) Nuclear/cell division was observed at two DAC. (C, D) Divided egg cells developed into multicellular structures at about 5 DAC. (E) White cell colonies were formed within 30 DAC, and (F) leafy shoots and roots were regenerated upon transfer to the regeneration medium at 60 DAC. (G). Mature plantlets were subsequently obtained at about 90 DAC, which were then cultivated in a soil pod.

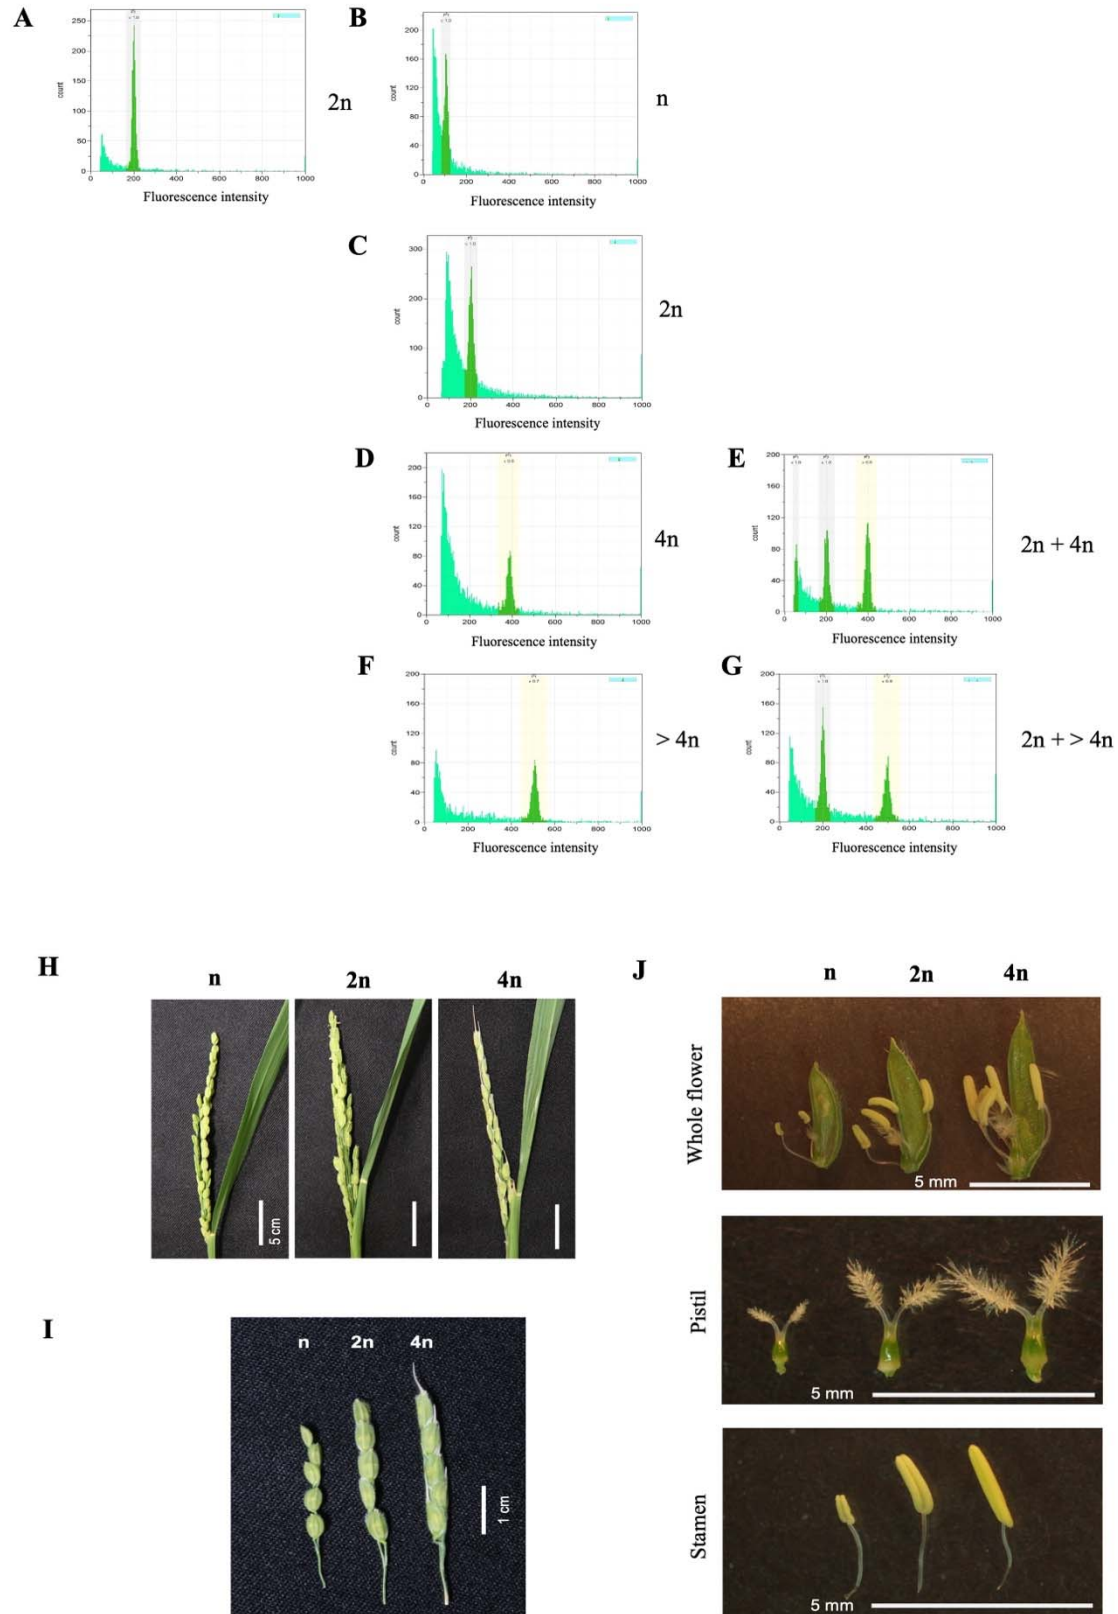



### **Figure 3. Ploidy levels and morphological characterization of reproductive structures of egg cell-derived plants**

(A) Nuclei extracted from the leaves of wild-type rice plants and (B–G) plants regenerated from NB egg cells subjected to 12-h cold temperature pretreatment; the DNA content per nucleus was measured via flow cytometry. B, C, and D indicate the haploid, diploid, and tetraploid amounts of DNA, respectively. F indicates the amount of DNA beyond  $4n$ , which was identified as aneuploidy. (E, G) Nuclei extracted from wild-type rice plants were loaded as an internal control, along with those from (E) tetraploid and (G) aneuploid plants. (H, I) Comparison of morphological features of (H) panicles and (I) florets of haploid ( $n$ ), diploid ( $2n$ ), and tetraploid ( $4n$ ) rice plants regenerated from cold-treated NB egg cells. (J) Flowers from egg cell-derived plants were dissected to observe differences in morphological features of reproductive structures: whole flowers (top panel), pistils (middle panel), and stamens (bottom panel) isolated from haploid ( $n$ ), diploid ( $2n$ ), and tetraploid ( $4n$ ) plants.

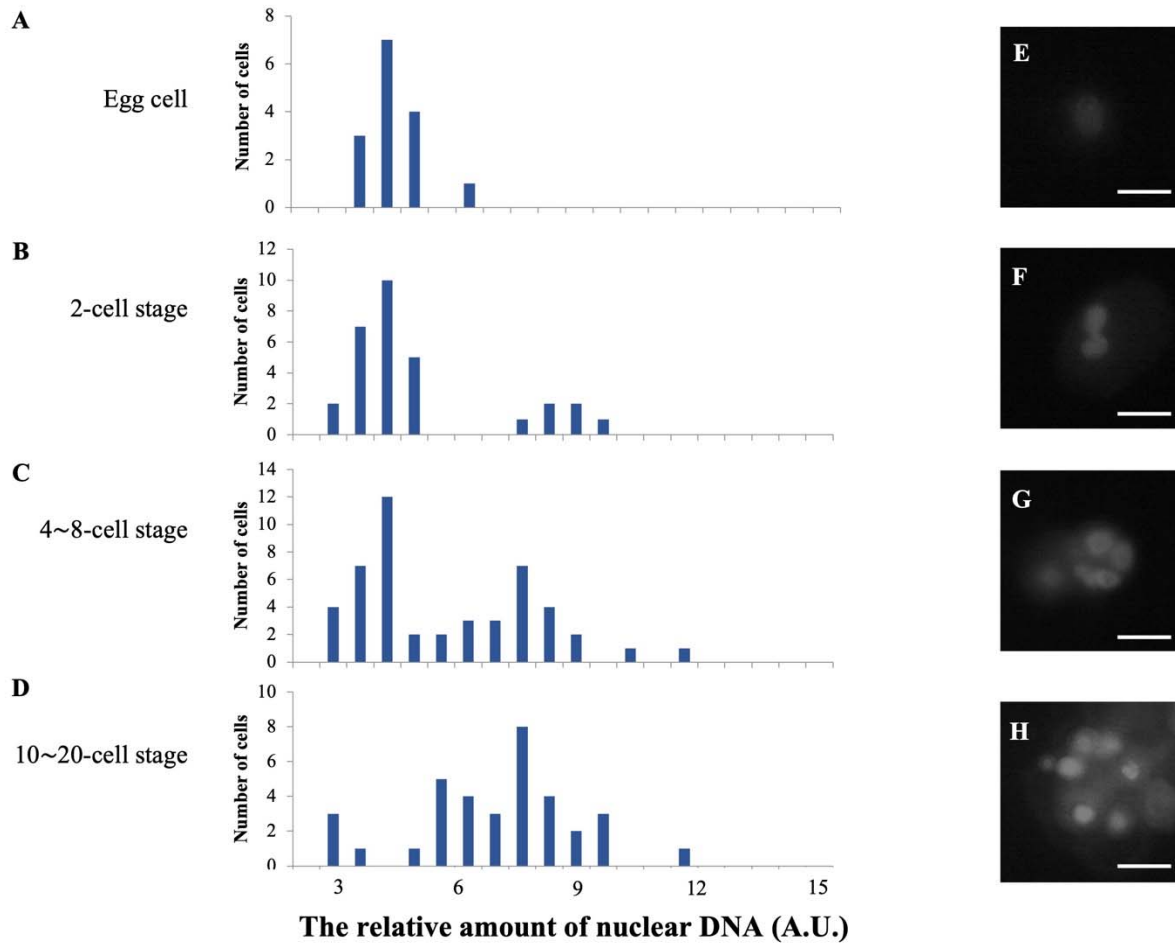

**Figure 4. Estimation of ploidy levels through direct visualization of nuclear DNA contents dividing egg cells and developing multicellular structures.**

Modified DAPI staining of nuclear DNA of egg cells and the cells of 2-celled, 4- to 8-celled, and 10- to 20-celled stages of egg-derived multicellular structures (Sukawa and Okamoto 2018). (A–D) Fluorescence intensity derived from the (A) egg, (B) 2-celled, (C) 4- to 8-celled, and (D) 10- to 20-celled stages was quantified and plotted as histograms. Fluorescence images showing fluorescence intensity representing the amount of nuclear DNA in (E) egg cells, (F) 2-celled, (G) 4- to 8-celled, and (H) and 10- to 20-celled stages. Scale bars in E–H: 20  $\mu$ m.

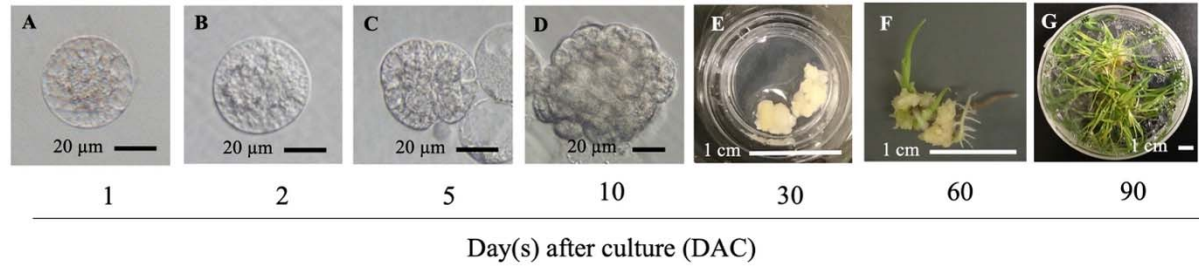

**Figure 5. Development and regeneration of plantlets derived from egg cells isolated from NBKS hybrid plants.**

(A) Egg cells isolated from NBKS plants were treated with or without cold temperature for 12 h prior to culturing in the growth and regeneration media. The cultured egg cells remained in a single-celled stage one day after culture (DAC). (B) Cell/nuclear division was then observed at 2 DAC, and (C, D) the formation of multicellular structures was visible from 5 DAC onwards. (E). Developing cell mass formed white-cell colonies at about 30 DAC. (F) Leafy shoots and branched roots regenerated at about 60 DAC. (G) Mature plantlets were formed and transferred to a soil pod.

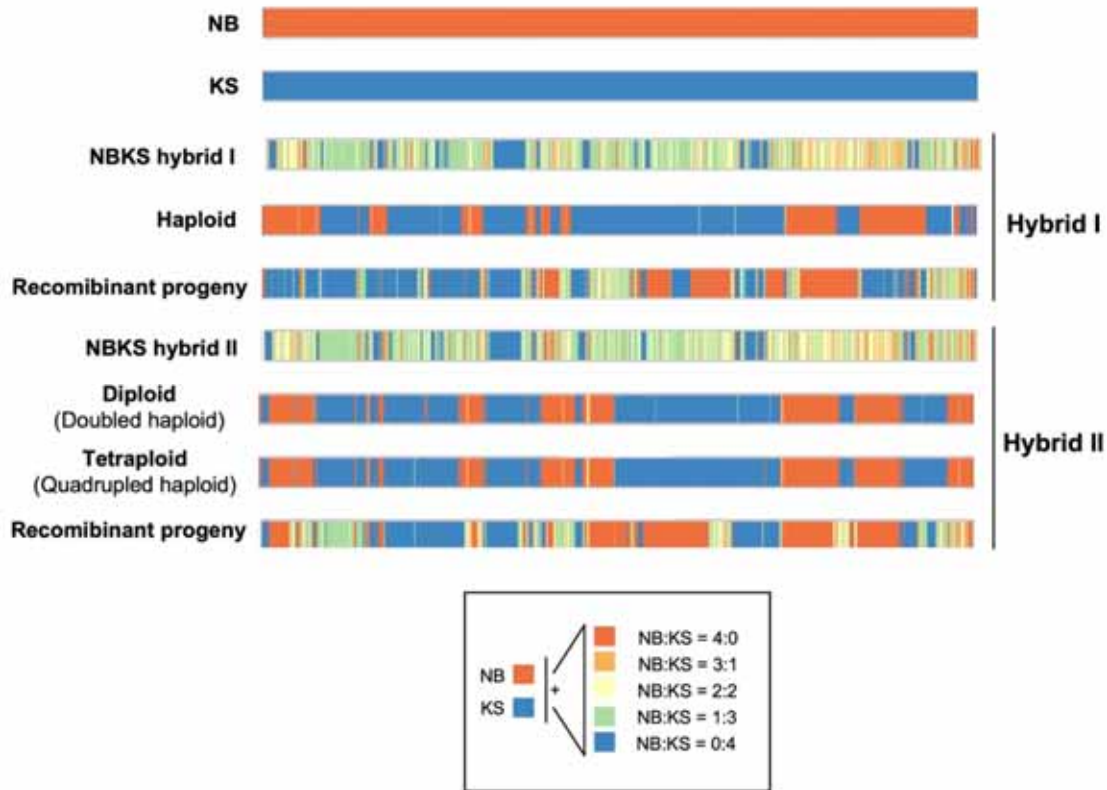

**Figure 6. Confirmation of polyploidization of egg cell-derived plants by investigating SNPs between NB and KS in regenerated egg cells isolated from NBKS hybrid plants.**

Whole-genome resequencing of haploid, doubled haploid, quadrupled haploid hybrid I and II NBKS egg cell-derived plants, and recombinant progeny of the hybrid plants for detection of SNPs between NB and KS. Blue and red colors indicate the SNPs of the NB and KS alleles, respectively. Orange, yellow, and green colors represent the coexistence of both NB and KS alleles at the same SNP-containing loci.

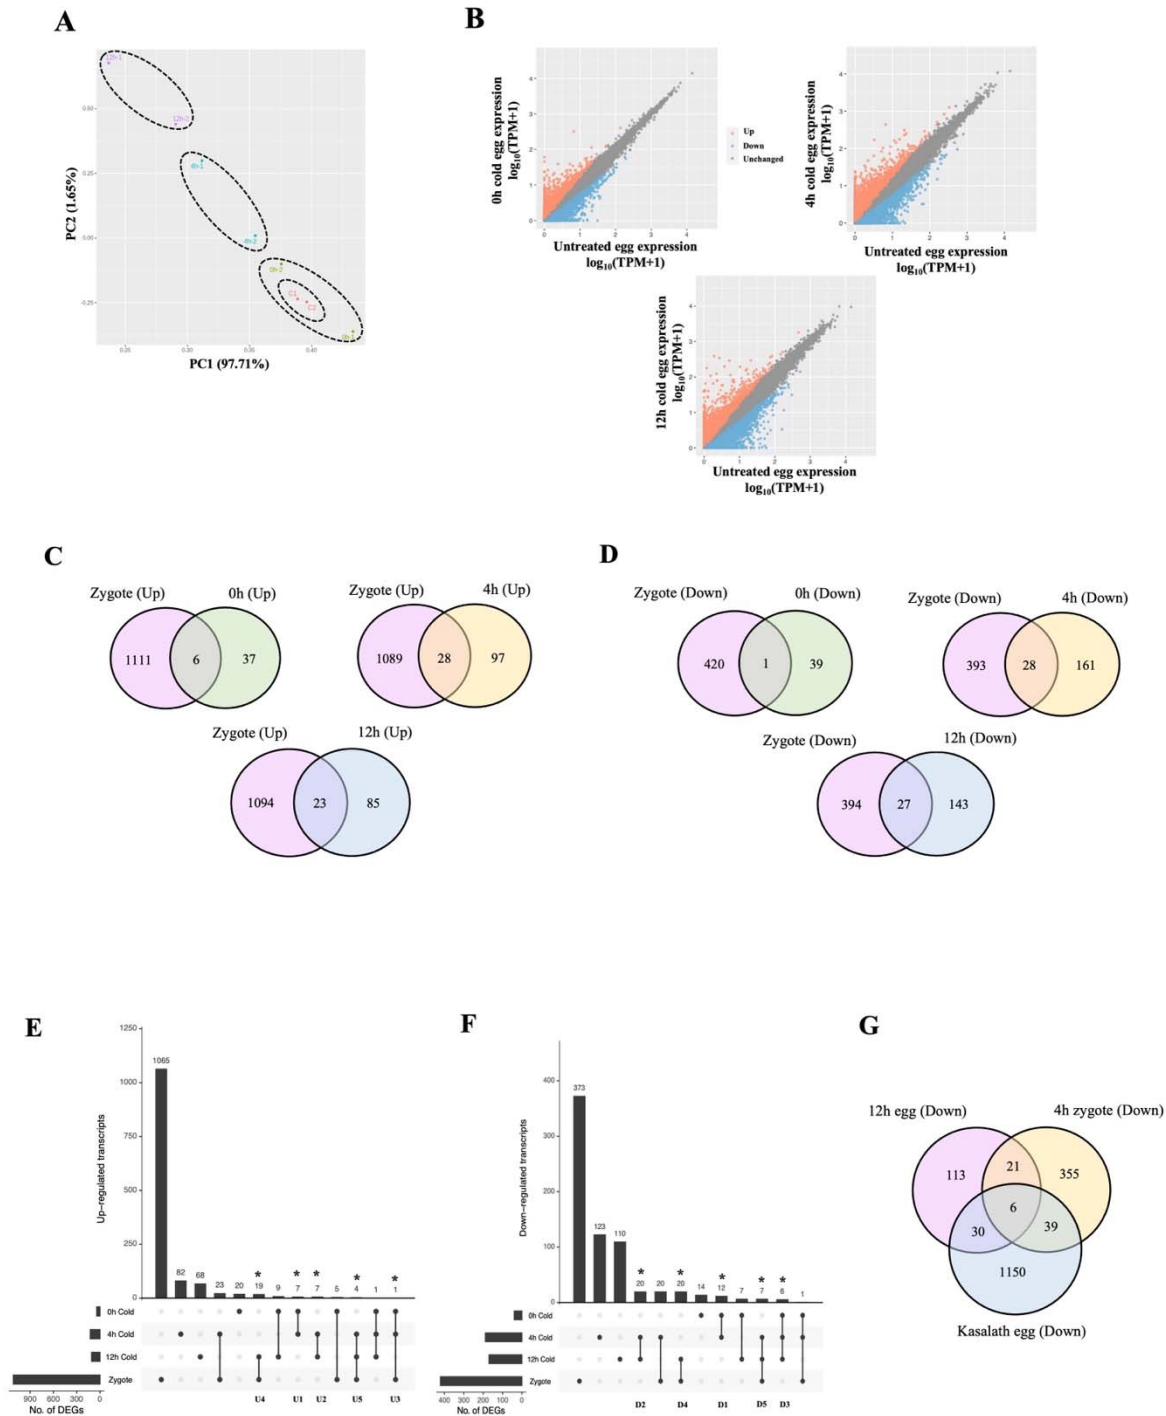

## Figure 7. Transcriptome analysis in cold-treated egg cells

(A) Principal component analysis of cold-treated egg cells at different post-cold treatment incubation periods of 0, 4, and 12 h. (B) Scatter plots showing upregulated (red dots) and downregulated (blue dots) DEGs in each post-cold treatment incubation period at 0, 4, and 12 h compared with the untreated egg cells. (C) Venn diagrams indicate the commonly upregulated DEGs in the cold-treated egg cells at 0, 4, and 12 h treatments and untreated egg cells and 4h zygotes and egg cells. (D) Venn diagrams indicate the commonly downregulated DEGs in the cold-treated egg cells at 0, 4, and 12 h treatments and untreated egg cells and 4h zygotes and egg cells. (E, F) Set visualization diagrams for overlapping DEGs identified as upregulated and downregulated genes in cold-treated egg cells at 0h, 4h, and 12h and 4h zygotes compared to the untreated egg cells. (E) Transcript sets with asterisks are identified as being continuously upregulated genes at 0–4 h, 4–12 h, and 0–12 h post-cold treatment periods, 12h cold-treated eggs and 4h zygote, and 4–12h cold-treated egg and 4h zygote were extracted and classified into five categories: U1–U5, respectively. (F) Transcript sets with asterisks were identified as being continuously downregulated genes at 0–4h, 4–12h, and 0–12h post-cold treatment periods, 12h cold-treated eggs and 4h zygote, and 4–12h cold-treated egg and 4h zygote were extracted and classified into five categories: D1–D5, respectively. (G) Venn diagram indicating commonly downregulated DEGs in 12h cold-treated egg cells, 4h zygotes, and KS egg cells.

**Table 1.** Developmental profiles of Nipponbare and Kasalath egg cells cultured with or without preceding cold treatment prior to cultivation.

| Cultivar name | Cold treatment | No. of egg cells | No. of cells developed into each growth stage |           |                   |            | Plantlet |
|---------------|----------------|------------------|-----------------------------------------------|-----------|-------------------|------------|----------|
|               |                |                  | Two-celled                                    | Cell mass | White cell colony | Plant line |          |
| Nipponbare    | -              | 30               | 0 (0%)                                        | 0         | 0                 | 0          | 0        |
|               | +              | 216              | 25 (11.5%)                                    | 19        | 16                | 8          | 8        |
| Kasalath      | -              | 53               | 18 (34%)                                      | 13        | 7                 | 7          | 14       |
|               | +              | 35               | 15 (42.8%)                                    | 11        | 4                 | 4          | 6        |
| Total         |                | 334              | 58                                            | 43        | 27                | 18         | 28       |

**Table 2.** Ploidy levels of plants derived from egg cells isolated from Nipponbare and Kasalath plants.

| Cultivar name | Cold treatment | No. of egg cells | No. of cells developed into each growth stage |           |                   |            | Plantlet |
|---------------|----------------|------------------|-----------------------------------------------|-----------|-------------------|------------|----------|
|               |                |                  | Two-celled                                    | Cell mass | White cell colony | Plant line |          |
| Nipponbare    | -              | 30               | 0 (0%)                                        | 0         | 0                 | 0          | 0        |
|               | +              | 216              | 25 (11.5%)                                    | 19        | 16                | 8          | 8        |
| Kasalath      | -              | 53               | 18 (34%)                                      | 13        | 7                 | 7          | 14       |
|               | +              | 35               | 15 (42.8%)                                    | 11        | 4                 | 4          | 6        |
| Total         |                | 334              | 58                                            | 43        | 27                | 18         | 28       |



**Table 3.** Rates of autonomous cell division of egg cells isolated from NBKS hybrid plants cultured with or without preceding cold treatment.

| <b>NBKS hybrid</b> | <b>Total egg cells</b> | <b>Total divided cells</b> | <b>Cold treatment</b> | <b>No. of egg cells</b> | <b>Divided cells</b> | <b>Division rate (%)</b> |
|--------------------|------------------------|----------------------------|-----------------------|-------------------------|----------------------|--------------------------|
| <b>I</b>           | 305                    | 73                         | -                     | 192                     | 49                   | 25.52                    |
|                    |                        |                            | +                     | 113                     | 24                   | 21.24                    |
| <b>II</b>          | 151                    | 31                         | -                     | 90                      | 22                   | 24.44                    |
|                    |                        |                            | +                     | 61                      | 9                    | 14.75                    |
| <b>III</b>         | 96                     | 17                         | -                     | 47                      | 9                    | 19.15                    |
|                    |                        |                            | +                     | 49                      | 8                    | 16.33                    |
| <b>Total</b>       | <b>552</b>             | <b>121</b>                 | -                     | <b>329</b>              | <b>80</b>            | <b>24.31</b>             |
|                    |                        |                            | +                     | <b>223</b>              | <b>41</b>            | <b>18.38</b>             |

**Table 4.** Developmental profiles of egg cells isolated from NBKS plants cultured with or without 12-h cold treatment.

| NBKS hybrid  | Cold treatment | No. of egg cells | No. of cells developed into each growth stage |           |                   |            | Plantlet  |
|--------------|----------------|------------------|-----------------------------------------------|-----------|-------------------|------------|-----------|
|              |                |                  | Two-celled                                    | Cell mass | White cell colony | Plant line |           |
| <b>I</b>     | -              | 192              | 49                                            | 21        | 58                | 45         | 45        |
|              | +              | 113              | 24                                            | 26        | 40                | 38         | 38        |
| <b>II</b>    | -              | 90               | 22                                            | 6         | 17                | 15         | 15        |
|              | +              | 61               | 9                                             | 15        | 18                | 17         | 17        |
| <b>III</b>   | -              | 47               | 9                                             | 5         | 16                | 20         | 20        |
|              | +              | 49               | 8                                             | 4         | 15                | 4          | 4         |
| <b>Total</b> | -              | <b>329</b>       | <b>80</b>                                     | <b>32</b> | <b>91</b>         | <b>80</b>  | <b>80</b> |
|              | +              | <b>223</b>       | <b>41</b>                                     | <b>45</b> | <b>73</b>         | <b>59</b>  | <b>59</b> |

**Table 5.** Ploidy levels of egg-derived plants regenerated from NBKS egg cells.

| NBKS hybrid  | Haploid (n) | Diploid (2n) | Tetraploid (4n) | Aneuploidy |          |          |
|--------------|-------------|--------------|-----------------|------------|----------|----------|
|              |             |              |                 | 3n         | 5n       | 6n       |
| <b>I</b>     | 4           | 25           | 29              | 2          | 1        | 3        |
| <b>II</b>    | 6           | 17           | 7               | 0          | 0        | 0        |
| <b>III</b>   | 0           | 9            | 18              | 0          | 0        | 0        |
| <b>Total</b> | <b>10</b>   | <b>51</b>    | <b>54</b>       | <b>2</b>   | <b>1</b> | <b>3</b> |

## Parsed Citations

**Abiko, M., Maeda, H., Tamura, K., Hara-Nishimura, I., and Okamoto, T. (2013). Gene expression profiles in rice gametes and zygotes: Identification of gamete-enriched genes and up-or down-regulated genes in zygotes after fertilization. *J. Exp. Bot.* 64: 1927–1940.**

Google Scholar: [Author Only](#) [Title Only](#) [Author and Title](#)

**Anderson, S.N., Johnson, C.S., Jones, D.S., Conrad, L.J., Gou, X., Russell, S.D., and Sundaresan, V. (2013). Transcriptomes of isolated *Oryza sativa* gametes characterized by deep sequencing: Evidence for distinct sex-dependent chromatin and epigenetic states before fertilization. *Plant J.* 76: 729–741.**

Google Scholar: [Author Only](#) [Title Only](#) [Author and Title](#)

**Asker, S.E. and Jerling, L. (1992). *Apomixis in Plants* 1st ed. (CRC press: Boca Raton, FL).**

Google Scholar: [Author Only](#) [Title Only](#) [Author and Title](#)

**Auwer, G.A. Van der and O'Connor, B.D. (2020). *Genomics in the Cloud* (O'Reilly Media, Inc.).**

**Avise, J.C. (2008). *Clonality: The Genetics, Ecology and Evolution of Sexual Abstinence in Vertebrate Animals* (Oxford University Press: Oxford).**

**Barlow, P.W. and Rathfelder, E.L. (1985). Cell division and regeneration in primary root meristems of *Zea mays* recovering from cold treatment. *Environ. Exp. Bot.* 25: 303–314.**

Google Scholar: [Author Only](#) [Title Only](#) [Author and Title](#)

**Baroux, C. and Grossniklaus, U. (2015). Chapter Ten - The Maternal-to-Zygotic Transition in Flowering Plants: Evidence, Mechanisms, and Plasticity. *Curr. Top. Dev. Biol.* 113: 351–371.**

Google Scholar: [Author Only](#) [Title Only](#) [Author and Title](#)

**Batista-Silva, W., Heinemann, B., Rugen, N., Nunes-Nesi, A., Araújo, W.L., Braun, H.P., and Hildebrandt, T.M. (2019). The role of amino acid metabolism during abiotic stress release. *Plant Cell Environ.* 42: 1630–1644.**

Google Scholar: [Author Only](#) [Title Only](#) [Author and Title](#)

**Brinkley, B.R. and Cartwright, J. (1975). Cold-Labile and Cold-Stable Microtubules in the Mitotic Spindle of Mammalian Cells. *Ann. N. Y. Acad. Sci.* 253: 428–439.**

Google Scholar: [Author Only](#) [Title Only](#) [Author and Title](#)

**Brower, P.T., Gizang, E., Boreen, S.M., and Schultz, R.M. (1981). Biochemical studies of mammalian oogenesis: synthesis and stability of various classes of RNA during growth of the mouse oocyte in vitro. *Dev. Biol.* 86: 373–383.**

Google Scholar: [Author Only](#) [Title Only](#) [Author and Title](#)

**Chen, J., Strieder, N., Krohn, N.G., Cyprys, P., Sprunck, S., Engelmann, J.C., and Dresselhaus, T. (2017). Zygotic genome activation occurs shortly after fertilization in maize. *Plant Cell* 29: 2106–2125.**

Google Scholar: [Author Only](#) [Title Only](#) [Author and Title](#)

**Chen, N., Xu, Y., Wang, X., Du, C., Du, J., Yuan, M., Xu, Z., and Chong, K. (2011). OsRAN2, essential for mitosis, enhances cold tolerance in rice by promoting export of intranuclear tubulin and maintaining cell division under cold stress. *Plant, Cell Environ.* 34: 52–64.**

Google Scholar: [Author Only](#) [Title Only](#) [Author and Title](#)

**Clowes, F.A.L. and Stewart, H.E. (1967). Recovery From Dormancy in Roots. *New Phytol.* 66: 115–123.**

Google Scholar: [Author Only](#) [Title Only](#) [Author and Title](#)

**Conner, J.A., Mookkan, M., Huo, H., Chae, K., and Ozias-Akins, P. (2015). A parthenogenesis gene of apomict origin elicits embryo formation from unfertilized eggs in a sexual plant. *Proc. Natl. Acad. Sci. U. S. A.* 112: 11205–11210.**

Google Scholar: [Author Only](#) [Title Only](#) [Author and Title](#)

**Conner, J.A., Podio, M., and Ozias-Akins, P. (2017). Haploid embryo production in rice and maize induced by PsASGR-BBML transgenes. *Plant Reprod.* 30: 41–52.**

Google Scholar: [Author Only](#) [Title Only](#) [Author and Title](#)

**Conway, J.R., Lex, A., and Gehlenborg, N. (2017). Genome analysis UpSetR : an R package for the visualization of intersecting sets and their properties. 33: 2938–2940.**

Google Scholar: [Author Only](#) [Title Only](#) [Author and Title](#)

**Danecek, P. et al. (2011). The variant call format and VCFtools. 27: 2156–2158.**

Google Scholar: [Author Only](#) [Title Only](#) [Author and Title](#)

**Deushi, R., Toda, E., Koshimizu, S., Yano, K., and Okamoto, T. (2021). Effect of Paternal Genome Excess on the Developmental and. *Plants*: 1–13.**

Google Scholar: [Author Only](#) [Title Only](#) [Author and Title](#)

**Fang, H., Shao, Y., and Wu, G. (2021). Reprogramming of Histone H3 Lysine Methylation During Plant Sexual Reproduction. *Front. Plant Sci.* 12: 1–17.**

Google Scholar: [Author Only](#) [Title Only](#) [Author and Title](#)

**Garcia-Aguilar, M., Michaud, C., Leblanc, O., and Grimanelli, D. (2010). Inactivation of a DNA methylation pathway in maize reproductive organs results in apomixis-like phenotypes. *Plant Cell* 22: 3249–3267.**

Google Scholar: [Author Only](#) [Title Only](#) [Author and Title](#)

**Ge, S.X. (2020). ShinyGO : a graphical gene-set enrichment tool for animals and plants. 36: 2628–2629.**

Google Scholar: [Author Only](#) [Title Only](#) [Author and Title](#)

**Gegas, V.C., Wargent, J.J., Pesquet, E., Granqvist, E., Paul, N.D., and Doonan, J.H. (2014). Endopolyploidy as a potential alternative adaptive strategy for Arabidopsis leaf size variation in response to UV-B. *J. Exp. Bot.* 65: 2757–2766.**

Google Scholar: [Author Only](#) [Title Only](#) [Author and Title](#)

**Gerard, D., Felipe, L., Ferrão, V., Augusto, A., and Garcia, F. (2018). Genotyping Polyploids from Messy Sequencing Data. 210: 789–807.**

Google Scholar: [Author Only](#) [Title Only](#) [Author and Title](#)

**Gürel, S., Gürel, E., and Kaya, Z. (2000). Doubled haploid plant production from unpollinated ovules of sugar beet (*Beta vulgaris* L.). *Plant Cell Rep.* 19: 1155–1159.**

Google Scholar: [Author Only](#) [Title Only](#) [Author and Title](#)

**Hand, M.L. and Koltunow, A.M.G. (2014). The genetic control of apomixis: Asexual seed formation. *Genetics* 197: 441–450.**

Google Scholar: [Author Only](#) [Title Only](#) [Author and Title](#)

**Kawahara, Y. et al. (2013). Improvement of the *Oryza sativa* Nipponbare reference genome using next generation sequence and optical map data.: 1–10.**

Google Scholar: [Author Only](#) [Title Only](#) [Author and Title](#)

**Kerk, N.M. and Feldman, L.J. (1995). A biochemical model for the initiation and maintenance of the quiescent center: Implications for organization of root meristems. *Development* 121: 2825–2833.**

Google Scholar: [Author Only](#) [Title Only](#) [Author and Title](#)

**Khanday, I., Skinner, D., Yang, B., Mercier, R., and Sundaresan, V. (2019). A male-expressed rice embryogenic trigger redirected for asexual propagation through seeds. *Nature* 565: 91–95.**

Google Scholar: [Author Only](#) [Title Only](#) [Author and Title](#)

**Kim, J.M., Sasaki, T., Ueda, M., Sako, K., and Seki, M. (2015). Chromatin changes in response to drought, salinity, heat, and cold stresses in plants. *Front. Plant Sci.* 6: 1–12.**

Google Scholar: [Author Only](#) [Title Only](#) [Author and Title](#)

**Klatt, S., Schinkel, C.C.F., Kirchheimer, B., Dullinger, S., and Hörandl, E. (2018). Effects of cold treatments on fitness and mode of reproduction in the diploid and polyploid alpine plant *Ranunculus kuepferi* (Ranunculaceae). *Ann. Bot.* 121: 1287–1298.**

Google Scholar: [Author Only](#) [Title Only](#) [Author and Title](#)

**Koltunow, A.M. and Grossniklaus, U. (2003). Apomixis: A Developmental Perspective. *Annu. Rev. Plant Biol.* 54: 547–574.**

Google Scholar: [Author Only](#) [Title Only](#) [Author and Title](#)

**Kondorosi, E., Roudier, F., and Gendreau, E. (2000). Plant cell-size control: Growing by ploidy? *Curr. Opin. Plant Biol.* 3: 488–492.**

Google Scholar: [Author Only](#) [Title Only](#) [Author and Title](#)

**Kumlehn, J., Kirik, V., Czihal, A., Altschmied, L., Matzk, F., Lörz, H., and Bäumllein, H. (2001). Parthenogenetic egg cells of wheat: Cellular and molecular studies. *Sex. Plant Reprod.* 14: 239–243.**

Google Scholar: [Author Only](#) [Title Only](#) [Author and Title](#)

**Kuo, M.H., Brownell, J.E., Sobel, R.E., Ranalli, T.A., Cook, R.G., Edmondson, D.G., Roth, S.Y., and Allis, C.D. (1996). Transcription-linked acetylation by Gcn5p of histones H3 and H4 at specific lysines. *Nature* 383: 269–272.**

Google Scholar: [Author Only](#) [Title Only](#) [Author and Title](#)

**Langmead, B. and Salzberg, S.L. (2012). Fast gapped-read alignment with Bowtie 2. 9: 357–360.**

Google Scholar: [Author Only](#) [Title Only](#) [Author and Title](#)

**Lazareva, E.M., Chentsov, Y.S., and Smirnova, E.A. (2008). The effect of low temperature on the microtubules in root meristem cells of spring and winter cultivars of wheat *Triticum aestivum* L. *Cell tissue biol.* 2: 436–450.**

Google Scholar: [Author Only](#) [Title Only](#) [Author and Title](#)

**Li, B. and Dewey, C.N. (2011). RSEM : accurate transcript quantification from RNA-Seq data with or without a reference genome.**

**Li, H. and Durbin, R. (2009). Fast and accurate short read alignment with Burrows – Wheeler transform. 25: 1754–1760.**

Google Scholar: [Author Only](#) [Title Only](#) [Author and Title](#)

Lim, C.J. et al. (2020). The Histone-modifying complex PWR/HOS15/HD2C epigenetically regulates cold tolerance1[OPEN]. *Plant Physiol.* 184: 1097–1111.

Google Scholar: [Author Only](#) [Title Only](#) [Author and Title](#)

Liscum, E. and Hangarter, R.P. (1991). Manipulation of Ploidy Level in Cultured Haploid Petunia Tissue by Phytohormone Treatments. *J. Plant Physiol.* 138: 33–38.

Google Scholar: [Author Only](#) [Title Only](#) [Author and Title](#)

Liu, X.-Q., Shi, J.-J., Fan, H., Jiao, J., Gao, L., Tan, L., Nagawa, S., and Wang, D.-Y. (2020). Nuclear DNA replicates during zygote development in *Arabidopsis* and *Torenia fournieri*. *Plant Physiol.*: 137–145.

Google Scholar: [Author Only](#) [Title Only](#) [Author and Title](#)

Martin, M. (2011). Cutadapt removes adapter sequences from high-throughput sequencing reads. *EMBnet* 17: 10–12.

Google Scholar: [Author Only](#) [Title Only](#) [Author and Title](#)

Medvedev, S., Pan, H., and Schultz, R.M. (2011). Absence of MSY2 in mouse oocytes perturbs oocyte growth and maturation, RNA stability, and the transcriptome. *Biol. Reprod.* 85: 575–583.

Google Scholar: [Author Only](#) [Title Only](#) [Author and Title](#)

Mogensen, H.L. and Holm, P.B. (1995). Dynamics of nuclear DNA quantities during zygote development in barley. *Plant Cell* 7: 487–494.

Google Scholar: [Author Only](#) [Title Only](#) [Author and Title](#)

Moh, C.C. and Alán, J.J. (1964). The Effect of Low Temperature on Mitosis in the Root Tips of Beans. *Caryologia* 17: 409–415.

Google Scholar: [Author Only](#) [Title Only](#) [Author and Title](#)

Murashige, T. and Nakano, R. (1967). Chromosome Complement as a Determinant of the Morphogenic Potential of Tobacco Cells. *Am. J. Bot.* 54: 963.

Google Scholar: [Author Only](#) [Title Only](#) [Author and Title](#)

Pacey, E.K., Maherali, H., and Husband, B.C. (2020). Endopolyploidy is associated with leaf functional traits and climate variation in *Arabidopsis thaliana*. *Appl. Plant Sci.* 107: 993–1003.

Google Scholar: [Author Only](#) [Title Only](#) [Author and Title](#)

Park, J. et al. (2018). Epigenetic switch from repressive to permissive chromatin in response to cold stress. *Proc. Natl. Acad. Sci. U. S. A.* 115.

Google Scholar: [Author Only](#) [Title Only](#) [Author and Title](#)

Pillot, M., Baroux, C., Vazquez, M.A., Autran, D., Leblanc, O., Vielle-Calzada, J.P., Grossniklaus, U., and Grimanelli, D. (2010). Embryo and endosperm inherit distinct chromatin and transcriptional states from the female gametes in *Arabidopsis*. *Plant Cell* 22: 307–320.

Google Scholar: [Author Only](#) [Title Only](#) [Author and Title](#)

Pires, M. V., Pereira Júnior, A.A., Medeiros, D.B., Daloso, D.M., Pham, P.A., Barros, K.A., Engqvist, M.K.M., Florian, A., Krahnert, I., Maurino, V.G., Araújo, W.L., and Fernie, A.R. (2016). The influence of alternative pathways of respiration that utilize branched-chain amino acids following water shortage in *Arabidopsis*. *Plant Cell Environ.* 39: 1304–1319.

Google Scholar: [Author Only](#) [Title Only](#) [Author and Title](#)

Pulido, A., Bakos, F., Devic, M., Barnabás, B., and Olmedilla, A. (2009). HvPG1 and ECA1: Two genes activated transcriptionally in the transition of barley microspores from the gametophytic to the embryogenic pathway. *Plant Cell Rep.* 28: 551–559.

Google Scholar: [Author Only](#) [Title Only](#) [Author and Title](#)

Pupilli, F. and Barcaccia, G. (2012). Cloning plants by seeds: Inheritance models and candidate genes to increase fundamental knowledge for engineering apomixis in sexual crops. *J. Biotechnol.* 159: 291–311.

Google Scholar: [Author Only](#) [Title Only](#) [Author and Title](#)

Rahman, M.H., Toda, E., Kobayashi, M., Kudo, T., Koshimizu, S., Takahara, M., Iwami, M., Watanabe, Y., Sekimoto, H., Yano, K., and Okamoto, T. (2019). Expression of genes from paternal alleles in rice zygotes and involvement of OsASGR-BBML1 in initiation of zygotic development. *Plant Cell Physiol.* 60: 725–737.

Google Scholar: [Author Only](#) [Title Only](#) [Author and Title](#)

Sailer, C., Schmid, B., and Grossniklaus, U. (2016). Apomixis allows the transgenerational fixation of phenotypes in hybrid plants. *Curr. Biol.* 26: 331–337.

Google Scholar: [Author Only](#) [Title Only](#) [Author and Title](#)

Sakai, H. et al. (2013). Rice Annotation Project Database (RAP-DB): An Integrative and Interactive Database for Rice Genomics Special Focus Issue – Databases. 54.

Google Scholar: [Author Only](#) [Title Only](#) [Author and Title](#)

Scholes, D.R. and Paige, K.N. (2015). Plasticity in ploidy: A generalized response to stress. *Trends Plant Sci.* 20: 165–175.

Google Scholar: [Author Only](#) [Title Only](#) [Author and Title](#)

**Shahbazian, M.D. and Grunstein, M. (2007). Functions of Site-Specific histone acetylation and deacetylation. *Annu. Rev. Biochem.* 76: 75–100.**

Google Scholar: [Author Only](#) [Title Only](#) [Author and Title](#)

**Sharma, R., Cao, P., Jung, K.H., Sharma, M.K., and Ronald, P.C. (2013). Construction of a rice glycoside hydrolase phylogenomic database and identification of targets for biofuel research. *Front. Plant Sci.* 4: 1–15.**

Google Scholar: [Author Only](#) [Title Only](#) [Author and Title](#)

**Sibi, M.L., Kobaissi, A., and Shekafandeh, A. (2001). Green haploid plants from unpollinated ovary culture in tetraploid wheat (*Triticum durum* Defs.). *Euphytica* 122: 351–359.**

Google Scholar: [Author Only](#) [Title Only](#) [Author and Title](#)

**Simon, A *FastQC: A Quality Control Tool for High Throughput Sequence Data.***

**Sukawa, Y. and Okamoto, T. (2018). Cell cycle in egg cell and its progression during zygotic development in rice. *Plant Reprod.* 31: 107–116.**

Google Scholar: [Author Only](#) [Title Only](#) [Author and Title](#)

**Sun, J., Nishiyama, T., Shimizu, K., and Kadota, K. (2013). *TCC : an R package for comparing tag count data with robust normalization strategies* **TCC : an R package for comparing tag count data with robust normalization strategies.****

**Thakur, P., Kumar, S., Malik, J.A., Berger, J.D., and Nayyar, H. (2010). Cold stress effects on reproductive development in grain crops: An overview. *Environ. Exp. Bot.* 67: 429–443.**

Google Scholar: [Author Only](#) [Title Only](#) [Author and Title](#)

**Toki, S., Hara, N., Ono, K., Onodera, H., Tagiri, A., Oka, S., and Tanaka, H. (2006). Early infection of scutellum tissue with *Agrobacterium* allows high-speed transformation of rice. *Plant J.* 47: 969–976.**

Google Scholar: [Author Only](#) [Title Only](#) [Author and Title](#)

**Torrey, J.G. (1967). Morphogenesis in Relation to Chromosomal Constitution in Long-term Plant Tissue Cultures. *Physiol. Plant.* 20: 265–275.**

Google Scholar: [Author Only](#) [Title Only](#) [Author and Title](#)

**Tsunewaki, K. and Mukai, Y. (1990). Wheat Haploids Through the Salmon Method. 13: 460–478.**

Google Scholar: [Author Only](#) [Title Only](#) [Author and Title](#)

**Uchiumi, T., Komatsu, S., Koshihara, T., and Okamoto, T. (2006). Isolation of gametes and central cells from *Oryza sativa* L. *Sex. Plant Reprod.* 19: 37–45.**

Google Scholar: [Author Only](#) [Title Only](#) [Author and Title](#)

**Uchiumi, T., Uemura, I., and Okamoto, T. (2007). Establishment of an in vitro fertilization system in rice (*Oryza sativa* L.). *Planta* 226: 581–589.**

Google Scholar: [Author Only](#) [Title Only](#) [Author and Title](#)

**Underwood, C.J. et al. (2022). A PARTHENOGENESIS allele from apomictic dandelion can induce egg cell division without fertilization in lettuce. *Nat. Genet.* 54: 84–93.**

Google Scholar: [Author Only](#) [Title Only](#) [Author and Title](#)

**Vijverberg, K., Ozias-Akins, P., and Schranz, M.E. (2019). Identifying and engineering genes for parthenogenesis in plants. *Front. Plant Sci.* 10.**

Google Scholar: [Author Only](#) [Title Only](#) [Author and Title](#)

**Wuest, S.E., Vijverberg, K., Schmidt, A., Weiss, M., Gheyselinck, J., Lohr, M., Wellmer, F., Rahnenführer, J., von Mering, C., and Grossniklaus, U. (2010). Arabidopsis Female Gametophyte Gene Expression Map Reveals Similarities between Plant and Animal Gametes. *Curr. Biol.* 20: 506–512.**

Google Scholar: [Author Only](#) [Title Only](#) [Author and Title](#)

**Yuan, L., Liu, X., Luo, M., Yang, S., and Wu, K. (2013). Involvement of histone modifications in plant abiotic stress responses. *J. Integr. Plant Biol.* 55: 892–901.**

Google Scholar: [Author Only](#) [Title Only](#) [Author and Title](#)

**Zhang, W., Bone, J.R., Edmondson, D.G., Turner, B.M., Roth, S.Y., and Annunziato, A.T. (1999). Essential and redundant functions of histone acetylation revealed by mutation of target lysines and loss of Gcn5p acetyltransferase. *Chemtracts* 12: 748–754.**

Google Scholar: [Author Only](#) [Title Only](#) [Author and Title](#)
